# Supplementary material for: Identification of an immune checkpoint gene signature that accurately predicts prognosis and immunotherapy response in endometrial carcinoma
Source: publisher site journal article supplement (doi:10.18632/aging.203189), 2021-06-22
Supplement: Supplementary file [file aging-v13i12-203189-supplementary-material-SD1.pdf]

## SUPPLEMENTARY FIGURE

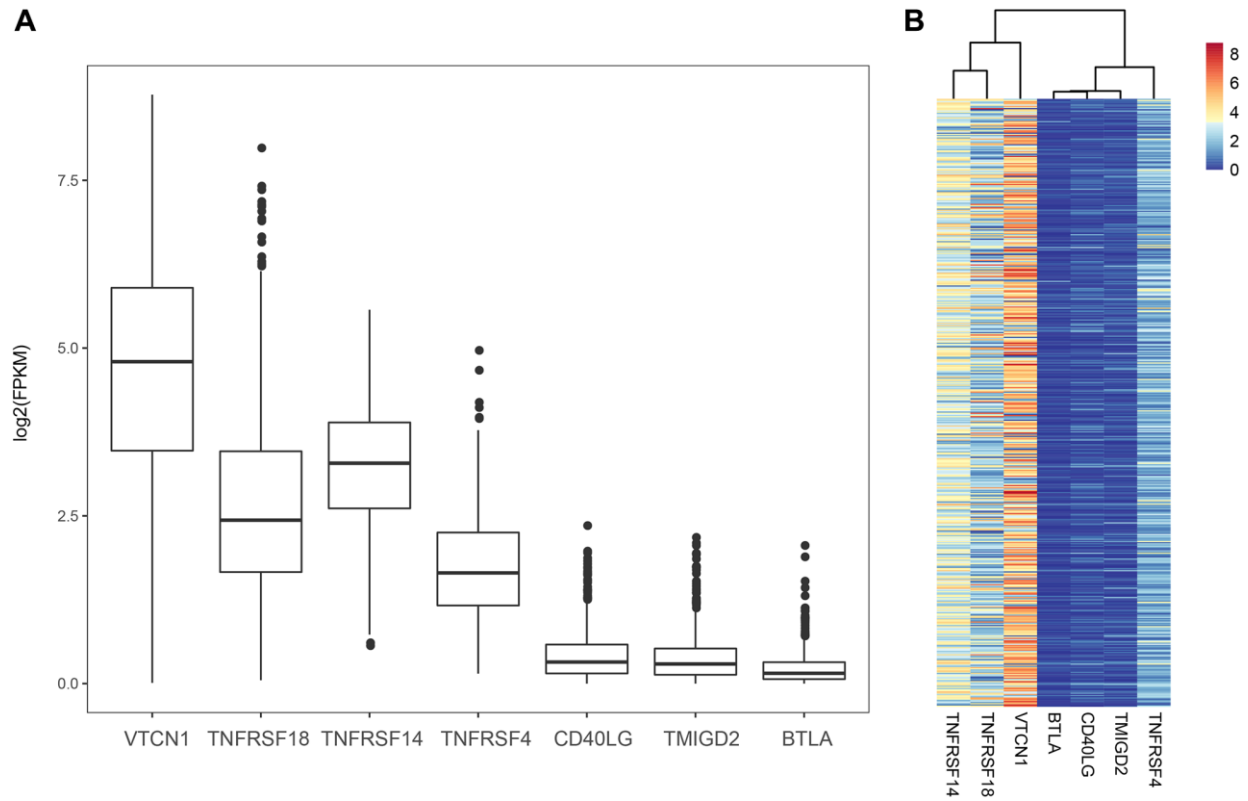

Supplementary Figure 1. Heat map of 7 ICGs divided into medium expression level group and low expression group.
