# Supplementary material for: Identification of an immune checkpoint gene signature that accurately predicts prognosis and immunotherapy response in endometrial carcinoma
Source: Aging (Albany NY). 2021 Jun 22;13(12):16696–712. doi: 10.18632/aging.203189 (PMC8266314; doi:10.18632/aging.203189)
Supplement: Supplementary Table 1 [file aging-13-203189-s002.xlsx]

## Sheet:  Supplementary Table 1
Supplementary Table 1. Correlation between TMB and ICG expression in EC samples.
BTLA	TNFRSF14	CD40LG	TMIGD2	VTCN1	TNFRSF4	TNFRSF18	TotalTMB
0.387295	8.44813	0.20336	0.347691	54.8245	2.14703	2.49483	2.15584
0.103264	2.16902	0.0175091	0.063023	20.4316	0.720945	3.08851	1.74026
0.234067	19.4456	0.198438	0.228565	3.23993	1.50845	1.52646	1.92208
1.46662	46.5654	1.4333	1.55618	3.52606	12.2052	40.9173	233.169
0.17148	3.10279	0.13084	0.0627934	1.5315	1.47347	3.90442	608.701
0	15.927	0	0	7.24858	1.9869	2.32955	1.32468
0.593889	14.2279	1.20837	1.6093	116.943	9.28126	9.17508	3.81818
0.0119451	8.24421	0.243043	0.279942	71.9237	1.95016	6.60801	12.8312
0.070485	8.43409	0.0614631	0.0589954	32.4422	0.670546	5.1084	9.55844
0.0935521	0.839768	0.190348	0.137029	1.47394	1.58763	3.15568	21.1948
0.0704568	12.5952	0.286713	0.619205	58.2202	1.23245	7.93116	0.025974
0.236069	7.96723	0.567654	0.471517	15.4645	2.53558	4.92259	0.909091
0.301742	7.60024	0.386559	0.0982164	17.5666	2.47274	4.34274	0
0.0315539	10.3168	0.0856025	0.0308122	0.398227	1.58161	25.3462	13.5844
0.205415	8.20189	0.48761	0.367741	40.4198	4.24105	2.37126	10.1039
0.133709	13.9796	0.884175	0.636508	12.1457	10.9147	12.1776	1.97403
0.0633148	6.79755	0.231885	0.296767	10.1765	5.76687	3.7247	1.2987
0.170231	10.5889	0.976116	0.362681	24.5712	16.2563	5.67954	1.61039
0.0634291	13.2476	0.150567	0.216783	33.5955	1.36256	2.3678	44.7792
0.201708	24.6801	0.796677	0.173794	69.3269	5.32707	55.3602	1.68831
0.521107	26.6897	1.12655	0.62017	17.6814	6.15685	6.02042	0
0.175923	9.8471	0.904284	0.18987	80.3019	1.88956	2.39866	1.27273
0.0944603	15.8845	0.21622	0.17295	58.9532	2.33354	0.637262	1.42857
0.590985	8.0804	0.917131	0.674904	9.13865	9.85504	12.407	10.5195
0.0512185	10.7024	1.1724	0.0750217	6.80289	3.96094	3.31717	1.09091
0.0611149	8.13085	0.198958	0.322262	85.1368	3.78101	6.59684	1.53247
0.156071	8.09652	1.37606	0.518166	19.3792	6.43711	4.09932	4.90909
0.172209	15.1804	1.05116	1.11707	50.9589	2.69523	50.6204	15.7922
0.224469	7.79138	0.126867	0.109596	27.7047	3.13428	3.2979	25.4026
0.123462	9.07645	0.16747	0.6028	58.6572	0.353624	10.7724	2.12987
0.234459	7.81182	0.658779	0.0981202	35.2216	1.94268	9.64109	1.76623
0.034704	11.5806	0.32952	0.203329	38.1328	1.491	1.96666	42.4675
0.257102	25.6625	0.597851	0.107597	16.8967	7.5481	5.25307	11.7922
0.32835	19.4855	0.639038	0.292751	10.7057	3.37342	4.27623	354.597
0.292194	11.2766	0.33293	0.205434	18.7855	2.13412	4.57328	0.961039
0.0364888	3.5113	0.0185607	0.227148	1.44837	3.74284	1.1816	4.05195
0.166238	9.05223	1.28531	0.844118	12.1143	2.04742	4.81498	1.74026
0.0201894	7.87928	0.410788	0.236577	137.037	0.932459	0.926191	1.87013
0.0520258	20.0411	0.0264638	0.209561	44.4391	0.558801	2.00061	4.1039
1.68611	42.9682	0.970947	1.14942	23.0928	30.2065	39.6912	42.6234
0.140192	8.9729	0.285244	0.215123	170.912	2.92551	29.3643	0.961039
0.113362	5.18154	0.243468	0.276742	8.30721	2.6652	3.89187	309.325
0.035945	12.6215	0.0487575	0.0877501	95.6093	1.55719	13.6769	23.8961
0.0981777	5.55215	0.199759	0.0625238	17.5118	0.651046	99.9617	1.09091
0.0202131	3.23532	0.123381	0.0888208	103.982	2.06251	3.39548	1.92208
0.0279928	8.90284	0.130185	0.0234298	11.1553	1.22844	33.6691	22.0779
0.0229004	14.174	0.124253	0.11181	128.397	0.828098	1.40075	2.44156
0.260416	11.6912	1.64257	0.19835	11.3928	2.49501	2.75476	1.4026
0.0787799	3.69305	0.320583	0.0329691	45.7306	1.90991	1.76147	2.77922
0.0404293	4.12583	0.155381	0.0789578	164.335	3.33886	1.98805	1.35065
0.388764	10.3999	1.24644	0.414136	64.3876	3.49237	11.8262	31.5584
0.50069	15.3325	2.53379	0.639357	45.0639	6.03973	4.81558	2.18182
0.0952951	5.09849	0.249293	2.79165	56.6476	1.84239	6.83305	1.32468
0.0313209	8.94843	0.0509822	0.0367015	226.644	0.484435	80.9877	5.74026
0.0312849	2.68739	0.127309	0.274945	31.6375	0.873668	1.18193	2
0.042019	5.9228	0.132992	0.205156	98.3853	1.34393	1.56226	44.6234
0.173167	11.44	0.260424	1.32336	116.212	4.56095	3.96188	2.41558
0.148877	5.17162	0.302915	0.17066	44.6114	4.32441	2.14848	1.01299
0.0130925	27.4508	0.0932361	0.115062	33.4678	1.11093	3.44473	47.3766
0.211648	14.892	0.131583	2.35951	20.2846	5.93579	13.9136	1.16883
0.151518	24.2837	0.209638	3.51545	63.1114	6.96543	5.31542	1.8961
0.090368	4.54975	0.226301	0.162911	210.451	1.58287	5.13986	2
0.356216	13.4326	0.712704	0.417411	41.9762	2.28289	3.47657	194.675
0.402363	15.022	0.922454	0.282227	15.9539	2.08173	2.76801	273.325
0.0307921	0.658977	0.010442	0.0150341	9.35176	0.19844	25.9391	2
0	6.78041	0.105152	0.0756981	28.5299	1.2434	1.53407	1.03896
0.336389	3.13904	0.576371	0.350092	113.561	1.71147	4.07297	8.7013
0.432196	10.2871	0.491081	0.246645	56.7414	2.60443	40.5327	0
0.043771	8.15597	0.158328	0.384678	3.71839	2.18353	2.88732	0
0.634171	6.23512	1.22627	0.303044	20.8357	2.77292	2.90078	1.79221
0.0260291	2.2256	0.114748	0.0508344	40.3791	0.857362	1.82626	2.46753
0.0783152	11.5187	0.119509	0.13383	30.026	1.38793	7.52007	32.6494
0.979187	9.26697	2.0853	0.573701	0.924846	1.96323	2.58953	20.8571
0.00562255	4.16467	0.01144	0.510605	43.2762	0.86963	15.643	12.4935
0.645915	8.87045	0.616043	0.487831	358.935	1.28997	1.34812	8.28571
0.152285	13.5886	0.309849	0.66148	27.7191	5.52742	4.54875	3.68831
0.250745	11.7296	0.291533	0.0699573	56.4439	0.500168	2.48103	2.67532
0.20752	2.57397	0.251059	0	17.4334	0.963866	0.756758	122.727
1.1078	30.0536	1.40528	3.14512	11.7594	4.7448	6.44023	21.7403
0.330366	18.1859	0.23221	0.316734	58.4253	2.40002	10.0173	8.75325
0.222305	3.66065	0.11308	0.260495	11.6342	2.1251	1.64973	237.299
0.0306584	3.27147	0.12476	0.0449066	4.8865	5.07118	1.90286	1.01299
0.0296547	1.52195	0.0603376	0.376449	1.96787	1.2316	17.552	34.2078
0.186094	4.20383	0.243412	0.311519	20.894	5.53956	9.11103	237.065
0.675885	28.6853	0.991951	1.39573	20.2041	3.68929	8.22251	306.675
0	3.28131	0	0.153999	34.5742	1.35512	8.3697	2.05195
0.0570977	4.2881	0.677688	0.334533	70.6655	3.86365	4.80217	1.03896
0.0126175	2.26521	0	0	12.96	0.433671	2.62175	1.92208
0.00998541	1.73925	0.142219	0.058504	48.3067	2.23084	1.18562	1.42857
0.100655	8.7002	0.04096	0.17692	12.2197	2.42171	1.03216	8
0.276578	11.2987	0.135059	0.324091	26.8075	0.285185	2.8063	0
0.189396	5.38742	0.269751	0.610313	7.71441	4.29231	5.13647	1.50649
0.0213974	0.477003	0.0217683	0.0940247	59.1401	1.26404	3.78208	1.76623
0.0215082	6.24593	0	0.0945116	49.7006	0.600642	6.90684	2.23377
0.0307144	10.8579	0.104156	0.329917	1.05036	3.49693	69.8437	15.2468
0.0267932	10.7592	0.163546	0.274715	3.73049	6.47508	4.66351	16.3117
0.422921	19.699	0.50618	0.364393	35.5799	2.8324	41.0857	6.28571
0.414305	8.24392	0.0702479	0.0674276	55.0564	1.18666	1.52175	12.8312
0.0560423	14.5788	0.387694	0.459689	35.5239	5.05631	23.8342	1.06494
0.273575	16.0644	0.927725	0.801431	38.8703	10.6436	24.4854	3.16883
0.0729791	14.0997	0.801838	0.342065	14.1899	4.76585	5.71117	1.14286
0.044872	18.7259	0.2739	0.131452	13.902	12.2097	4.76283	1.79221
0.649461	13.1751	1.29391	0.396371	2.57794	3.982	6.06106	350.182
0.0464149	9.03184	0.440716	0.0906475	4.00598	2.3265	1.58653	1.94805
0.0899977	3.8597	0.392391	0.338974	14.9645	2.51329	2.11637	0.935065
0.188788	25.9328	0.823118	0.632057	85.922	2.92574	21.4334	11.9481
0.226059	2.47013	0.175222	0	39.7578	1.41059	4.41546	17.2468
0.0773348	12.5835	0.134872	0.258915	54.7148	1.18663	9.59978	20.6494
0.0443943	4.59863	0.248401	0.357643	8.32285	1.28745	8.47583	0.519481
0.427154	14.5692	0.516039	1.25134	0.440185	4.7027	14.7329	22.8571
0.684097	13.0136	1.25545	1.72898	15.7437	10.6327	10.3524	346.675
0.0985614	12.5712	0.111411	0.192489	19.7953	3.43468	4.96481	14.7532
0.0317597	13.8391	0.0430804	0	1.66795	1.43273	49.8802	23.4026
0.0753093	10.2297	0.191537	0.551543	28.2834	1.01111	1.16855	18.0519
0.279521	6.02034	0.153121	0.0629885	52.1803	3.76442	0.928368	0.909091
0.0438696	4.73988	0.0669452	0.0963862	88.1789	1.86123	3.07798	30.5455
0.128427	9.15513	0	0.815151	26.0768	1.79324	2.657	393.091
0.0423883	5.0649	0.495916	0.372526	2.1873	1.34309	7.17775	176.078
0.411624	18.6102	0.497985	0.456265	40.5855	3.20238	3.09218	20.6753
0.0338008	3.35561	0.298018	0.69313	0.17889	4.16296	3.6181	1.37662
0.0490658	1.18131	0	0.0359343	0.958818	1.84453	2.1847	0.909091
0.0120764	4.18178	0.0122857	0.0884436	53.8647	4.41015	14.1108	0
0.0869448	11.2115	0.457003	0.106126	64.4392	1.80546	2.73728	1.32468
0.134904	11.853	0	0.316158	105.877	4.52082	16.9644	15.4286
0.0692588	4.30249	0	0	90.8059	0.297559	0.186898	1.42857
0.0854947	4.33698	0.0289923	0.16697	15.8194	1.5917	0.269163	0.831169
0.0629933	8.49643	0.256341	0.266554	16.396	1.71406	3.04093	2.1039
0.195534	6.28685	1.1026	0.180026	3.99842	1.1041	0.452276	5.27273
0.148049	18.2652	0.662711	0.780674	4.60486	5.4066	9.16227	225.455
0.0175342	4.02347	0.0178381	0	33.579	1.09232	1.44316	0
0	4.65928	0.108484	0.390483	17.5822	3.43607	75.1774	0.831169
1.17651	15.9916	2.91139	0.838352	42.0202	14.6176	7.63682	29.8182
0.0618034	19.3376	0.251499	0.362103	30.5706	2.65528	76.9406	8.38961
0.290494	3.72771	0.89678	0.469514	100.308	2.62523	3.35189	1.32468
0.111243	12.0523	0.141464	0.244412	47.8246	0.477937	2.10135	0
0.11598	5.25373	0.89673	0.543618	25.129	6.62726	4.0687	206.805
0.974883	13.2958	2.84599	2.81451	11.2854	4.79545	4.11771	12.4935
0.0116628	4.95723	0.35595	0.614988	18.6885	1.42806	3.9026	1.74026
0.225696	19.5216	0.80363	1.32234	24.7397	4.84833	8.22216	1.63636
0.200839	7.06523	0.192302	0.173045	20.6479	1.29431	1.56216	1.58442
0.0458393	8.54288	0.23317	0.234999	20.4767	2.16635	2.31936	1.55844
0.0647217	5.50963	0.184363	0.227521	51.9499	3.44803	4.15677	1.61039
0.0912973	5.74522	0.318446	0.0764152	0.111505	0.504314	0.0351956	0
0.165421	1.59962	0.224385	0.0646128	1.85872	1.37403	0.982067	220.753
0.295002	5.30005	0.400155	0.352082	64.9604	2.83998	4.39315	155.143
0.0191643	4.39184	0	0.0280707	10.6966	0.391098	8.66238	34.8052
0.010764	5.54779	0.0438023	0.157664	39.7155	0.346842	2.75946	28.1818
0.576867	3.61394	0	0.0185705	6.52677	4.03083	1.89883	1.2987
0.0116296	9.9208	0	0.0681375	13.7776	4.1221	10.5761	1.84416
0.619921	11.3964	0.523573	0.61677	51.5995	3.56794	2.68292	29.7922
0.120879	10.659	0.355259	0.27542	11.2202	3.37569	3.44318	2.85714
1.01127	8.64179	2.1862	0.786911	2.14214	8.62163	5.6711	0.701299
0.242597	2.38678	0.394884	0.106602	270.916	1.5113	1.17838	367.506
0.156323	14.5685	0.1468	0.422719	32.0899	0.852438	0.389395	3.61039
0.17492	13.0654	0.167485	0.301427	23.5881	0.309448	0.166599	1.24675
0.14443	18.6236	0.988463	0.19232	39.8339	4.00517	13.8184	1.63636
0.273349	26.6075	0.308987	0.593163	56.1738	0.108741	0.437122	1.81818
0.0311066	2.44709	0.126583	0	2.79873	1.09143	1.00731	1.03896
0.0251328	3.89204	0.230116	0.110439	227.133	3.69828	2.88243	0.753247
0.0631357	8.85009	0.436766	0.665837	86.4097	1.27489	4.39566	1.71429
0.285949	5.40038	0.648945	0.064437	12.2503	4.607	6.73705	6.33766
0.362684	21.5992	0.737943	0.594986	33.2398	4.90837	3.44509	5.76623
0.118407	23.1815	0.140536	0.375776	3.84435	2.16204	21.062	1.32468
0.0888551	2.18832	0.2841	0.260299	49.8893	1.47247	4.69282	2.96104
0.178612	7.73117	0.408844	0.26162	0.218146	1.17505	0.54224	1.74026
0.30233	23.8522	0.307571	0.506096	9.2312	1.25252	1.8648	62.2857
0.0623883	0.51923	0.0362685	0.0261093	0.032656	0.191458	0.144306	444.338
0.0511607	3.13866	0.0416381	0.0299748	84.8167	1.121	11.2932	268.364
0.874471	2.16507	0.058657	0.112604	19.3301	1.30051	1.24473	0.701299
0.13019	7.26094	0.481625	0.20803	3.41141	2.56788	7.9846	31.7922
0.0338598	0.854027	0.00984194	0.0283404	7.38471	0.477983	0.652657	1.2987
0.0646851	3.56333	0.394839	0.0631645	4.26614	3.84441	4.16023	60.4675
0.0176852	3.64811	0.107951	0.0777124	14.6445	0.740819	0.143172	2.1039
0.123537	11.3029	0.114254	0.0986998	0.692681	4.83713	4.33381	19.3506
0.0937743	5.8115	0.07155	0.240371	45.8265	1.20866	2.21422	12.7013
0.159507	9.68762	0.676133	0.214166	18.361	5.5823	4.23261	2.15584
0.498763	7.97852	1.70674	0.376348	96.9211	3.24675	8.72817	1.76623
0.213568	19.6748	0.176533	1.79873	8.5262	5.54838	9.11311	5.2987
0	11.57	0.0397595	0.0954081	15.521	1.69309	130.055	30.987
0.0456227	12.2012	0	0.0835317	14.0277	0.232763	0.969529	28.0779
0.247326	15.4869	0.223657	0.422646	7.54334	3.54199	4.02305	2.49351
0.0286423	1.62486	0.0832538	0.0599335	258.547	0.38675	0.673547	3.87013
0.253152	8.69761	0.316973	0.646526	73.5068	4.47601	4.1514	18.8312
0.0982042	12.2742	0.624417	2.33746	38.7259	4.16644	9.73904	0.805195
0.0434991	6.2643	0.13276	0.318574	74.2719	0.607382	2.25964	1.55844
0.0101082	7.21682	0.123401	0	28.3948	0.651424	0.300051	0
0.0630687	11.5402	0.102659	0.110855	6.63985	1.00257	20.5253	10.5195
0.575843	14.4148	0.298238	0.521411	160.455	4.22832	3.47516	3.81818
0.137318	3.79215	0.253998	0.365701	0.0914795	1.58218	4.37933	267.662
0.401247	17.8546	0.912453	0.898868	13.3325	12.3715	9.42656	16.2338
0.211085	12.2061	1.17133	0.168646	6.25768	3.31841	4.68643	0.597403
0.0424183	8.03561	0.143846	0.124264	71.1314	1.09346	1.37361	1.19481
0.420628	25.3217	1.11259	1.15007	73.0352	4.90945	73.4397	8.88312
0.106359	3.63907	0.0480901	0.380815	12.1241	1.21854	4.81545	1.48052
0	15.3737	0.0555642	0.16	0.483621	2.25855	36.3678	1.42857
0.0439916	23.0396	0.507215	1.28873	24.9123	5.29209	25.3651	11.0909
0.287024	16.452	0.737685	0.221271	37.3249	5.45184	5.54412	1.2987
0.277013	13.4274	0.628664	1.09241	39.4801	3.27288	12.6792	1.16883
0.0517603	17.2373	0.463387	0.272935	55.1885	2.02366	19.2475	22.9091
0.19298	5.37753	0.269948	0.423998	79.3996	4.74146	1.13917	0
0.146518	6.61961	0.135507	0.11706	51.0978	1.48789	4.09762	254.078
0.0259713	2.94887	0	0	2.33141	2.65006	2.7333	19.4805
0.082327	17.529	0.418771	0.643134	3.51923	2.97702	10.0714	16.4416
0.546601	8.18312	0.749002	0.228751	122.7	5.87096	4.09395	29.7922
0.328966	6.36221	0.691649	0.192739	14.1694	5.58272	2.66318	23.6364
0.31264	11.8227	0.22572	0.502252	25.0906	1.25655	5.25253	12.8571
0.098425	19.8351	0.425558	0.180209	35.8077	1.18931	8.36652	0
0.165946	10.3644	0.780806	0.698819	11.1092	4.03268	3.16267	1.06494
1.18015	32.2128	2.32539	0.764229	12.2896	3.46917	4.55913	56.5455
0.128026	17.9614	1.02026	0.312542	77.361	10.8863	23.2914	2.7013
0.0220786	3.09095	0	0.0646788	51.5581	0.521715	4.2004	0
0	13.1184	0.220717	0.136193	3.1608	0.898825	4.18188	1.19481
0.149248	5.09135	0.233593	0.269058	26.5081	2.18262	5.29774	17.974
0.0562675	5.19132	0.366355	0.296702	84.0467	2.44162	1.18435	1.37662
0.0244822	4.64997	0.249066	0.0717201	1.70437	3.76033	2.57658	10.6494
0.0129977	9.27204	0.185122	0.152305	1.71446	2.40122	1.54329	16.961
0.0927475	5.89162	0.431339	0.543403	5.58291	1.76467	12.4784	2.02597
0.543109	5.13575	0.282687	0.259004	0.0771304	2.25198	1.70419	1.63636
0.526846	21.6483	0.552221	0.841845	90.8836	2.12633	10.8136	31.3766
0.170808	7.73733	0.208522	0.0333584	62.9598	0.856155	1.96664	8.49351
0.107996	8.988	0.30763	0.0632741	74.1803	1.18316	2.18573	0.961039
0.905328	17.1786	2.64423	0.641646	0.410184	12.5157	7.92026	201.922
0.069906	5.3972	0.124456	0.281583	81.5103	1.22013	9.44399	0
0.0739202	8.44338	0.214862	0.216547	26.6331	8.6202	5.15789	0.857143
0.0684177	9.3488	0.37785	0.171796	90.6761	0.524903	37.8224	2.15584
0.0290896	1.38343	0.0789171	0.0852174	8.54457	1.28103	4.97163	22.2338
0.215367	8.82816	0.33861	0.2581	114.421	1.38793	2.66812	209.844
0.0703457	3.49183	0.190841	0.103038	35.4261	2.01486	1.80339	1.2987
0.134516	13.0707	0.398103	0.537356	38.3542	7.51304	5.11495	1.66234
0.465309	3.33283	0.392555	0.0997399	67.7941	2.85241	1.62316	4.15584
0.184844	9.25677	0.402035	0.373446	23.2297	2.36877	2.23604	1.79221
0.0731613	8.59167	0.121794	0.350713	44.515	1.01442	2.67426	344.442
0.0809795	9.90075	0.109845	0.336072	67.3616	1.17421	4.00632	1.63636
0.44177	10.2027	0.524334	0.409816	20.476	8.62006	7.13294	408.987
0.035752	5.02998	0.230355	0.104735	3.88622	3.25125	13.6517	1.50649
0.0985664	5.95573	0.372451	0.226873	102.145	2.63159	3.91379	1.09091
0.0749207	5.08228	0.28794	0.048773	40.5056	1.10871	1.34784	3.06494
0.767178	11.1144	1.08689	0.149829	2.57498	3.07632	3.94117	39.7922
0.0806426	8.75601	0.154429	0.166758	32.3402	8.95722	4.92839	1.66234
0.0302771	17.6321	0.0385025	0.177392	194.3	3.66665	53.7919	2.18182
0.10279	7.65042	0.146401	0.210785	6.30221	0.552028	1.19275	1.03896
0.473681	7.71307	1.55044	2.23229	20.2233	4.31351	2.47313	13.6104
0.0115043	0.943775	0.0936299	0	17.8022	1.6805	94.5625	4.31169
0.161445	4.45478	0.985461	0.354711	23.3821	3.06349	4.46556	0.831169
0.0381513	8.55026	0.258751	0.0372544	57.7942	3.52408	10.3296	1.81818
0.0150792	7.89736	0.0306812	0.0441741	85.8592	1.97595	0.651068	17.4026
0.0211783	0.893876	0.0430908	0	252.774	0.65967	1.05728	1.22078
0.127633	17.929	0.441477	0.673019	57.2718	4.3046	18.0134	1.79221
0.472482	11.2502	2.0526	2.31934	7.22106	10.2046	7.6156	2.33766
0.0353403	7.66818	0.071906	0.0517643	53.0252	1.70813	9.01221	1.81818
0.0761339	8.74796	0.331945	0.159309	3.94524	5.56065	0.821801	1.24675
0.0954431	21.0403	1.4241	1.53779	27.0051	11.3107	44.5144	1.37662
0.045642	13.7925	0.0928665	0.222845	73.3782	1.96093	41.0556	4.77922
0.267432	14.6262	0.49682	0.306562	58.4376	3.99645	6.11856	0
0.0865242	14.0677	0.0880242	0.887148	23.8298	1.25461	4.14443	1.58442
0.0790359	12.1581	0.346365	0.391826	6.40067	3.26505	10.1063	2.46753
0.0512279	13.8639	1.04232	0.0750355	33.8799	2.80618	2.14273	1.24675
0.0733672	14.8464	0.089567	0.257913	37.2763	4.88576	13.0274	23.013
0.20379	11.5517	0.560992	0.14047	49.838	2.24038	1.26162	14.5974
0.0112714	3.67858	0.458674	0.132078	162.827	2.59079	5.53579	0.961039
0.118836	10.0765	0.74736	0.0632961	22.6286	2.87771	19.5326	5.50649
0.0116756	5.10843	0.0712683	0.136814	232.095	2.15699	17.5495	1.97403
0.127394	7.75906	0.848307	0.271417	21.3868	2.96055	1.68764	0.909091
0.230671	10.003	0.568149	0.177828	86.5647	3.07744	9.23884	1.16883
0.153277	16.4287	0.623738	0.224511	65.4278	3.2268	10.5888	13.1688
0.413153	10.104	0.677175	0.437061	17.4928	3.82128	6.62752	5.35065
0.308569	9.00297	0.452042	0.433894	56.2739	2.25372	2.16498	9.45455
0.147562	22.0315	0.138573	0.266018	5.8642	0.926582	24.6885	1.8961
0.0775081	6.24003	0.450582	0.129748	21.4481	2.40237	1.31471	1.42857
0.114543	7.25561	0.414325	0.335551	12.3886	1.12093	2.16369	4.5974
0.0447863	5.26491	0.0455627	0.0984003	46.7406	0.986138	0.664717	3.27273
0.131327	9.97872	0.971661	0.279795	13.2399	3.02629	1.15982	0.909091
0.00993085	8.62513	0.222266	0.232738	31.3049	1.77065	2.70668	2.36364
0.0818057	12.5833	0.145642	0.419384	28.2628	1.55963	15.2322	1.66234
0.08582	6.53022	0.50202	0.879927	64.134	2.7423	5.87657	11.3247
0.0561971	15.2338	0.388765	0.888992	40.9207	1.81081	25.7805	1.32468
0	2.54347	0	0	51.9828	0.594447	8.67376	29.0909
0.303277	8.37697	0.176305	0.507681	103.356	2.48962	4.03356	41.5325
0.0618184	15.6612	0.356377	0.150913	355.058	0.929575	3.80904	153.584
0.179671	10.773	0.819385	0.145198	1.67985	1.47731	0.585163	0
0.273538	12.3403	0.515333	0.296786	4.24409	3.04684	6.78007	1.63636
0.555051	8.07957	0.396798	0.439462	57.4389	3.25478	4.08866	24.3636
0.0165819	2.68368	0.0843467	0.133585	32.6464	1.41592	2.15904	18.0519
0.0310588	8.2378	0.221181	0.0151644	0.347723	0.311359	0.195565	1.58442
0.160528	7.61043	1.11596	0.078377	6.97643	5.17261	30.937	17.8442
2.68689	5.73331	0.128257	0.0923305	54.9019	0.355453	0.701678	1.45455
0.070197	10.6232	0.163232	0.0293772	16.412	14.3902	8.25371	3.50649
0.0377773	2.90449	0.0256215	0.0368892	26.8067	0.649216	1.46119	2.12987
1.12477	2.28959	0.554798	0.59909	150.257	0.256264	0.873782	4.44156
0.185514	7.96036	0.228763	0.115279	72.6552	2.536	1.36532	26.5974
0	8.91116	0.0740291	0.284228	1.68861	0.625269	5.98917	1.06494
0.432741	2.82172	0.385212	0.0792315	45.0732	0.4648	1.13128	2.38961
0.150686	7.23985	0.492746	0.157654	0.177467	0.49711	0.232362	2.31169
0.17319	6.75649	0.440481	0.174404	32.9978	0.476678	2.0447	1.79221
0.271295	15.1102	0.275998	0.701252	91.2219	1.01131	6.86883	143.844
0.103955	8.78906	0.305521	0.23686	14.3752	0.918066	3.31957	0.779221
0.0551109	6.13299	0.0672796	0.161446	6.73093	1.84685	10.8268	1.63636
0.927495	35.0583	0.367626	1.41147	34.6604	5.01985	15.3098	14.2597
0.0302981	12.752	0.0821955	0.207101	56.8262	2.42985	5.20542	40.4416
0.237552	27.6315	0.0402784	0.376947	79.6775	7.88841	162.504	2.33766
0.123673	8.67535	0.251635	0.217379	0.241676	2.07224	5.40655	8.7013
0.150782	11.7504	0.529914	0.0803114	7.51693	2.50291	12.6136	1.16883
0.17053	8.41409	0.62455	0.39965	55.6927	2.85735	4.41774	2.54545
0.135358	2.87202	0.190668	0.122009	17.7653	2.70641	2.44449	22.0779
0.103576	6.88244	0.234158	0.37085	139.489	1.35971	39.0373	1.58442
0.124854	5.04034	0.48498	0.266005	3.21614	2.82837	6.43218	5.48052
0.169944	11.4704	0.132993	0.153184	7.87131	4.80206	3.10438	12.4675
0.950256	5.6631	0	0.0695938	120.44	0.382746	18.1104	0
0.430016	9.07877	1.88245	0.496254	16.2652	6.18631	8.65037	9.48052
0.589703	11.23	0.848171	0.387203	21.6069	5.67868	4.52708	246.026
0.0629343	25.5652	0.725621	0.24582	0.947993	6.24144	5.26476	69.5584
0.82138	16.0672	2.28102	0.227615	2.62997	5.19801	9.40526	10.9351
0.712624	22.5039	2.15297	0.822394	73.0309	5.52029	12.5289	13.5844
0.0635499	12.3535	0.0646516	0	4.77339	0.887353	4.2873	13.5584
0.176562	6.51564	0.386881	0.238724	42.9461	2.04231	9.41926	257.273
0	27.6022	0.0248288	0.285983	13.8606	5.45246	35.9594	12.7013
0.231271	14.8023	0.201669	1.03238	54.9856	0.922644	7.22165	1.45455
0.0181554	37.0733	2.43806	0.372301	3.03783	24.4145	28.6119	1.58442
0.312454	27.8802	0.22251	0.137299	52.9298	2.75194	4.13153	2.25974
0.0256659	12.7629	0.0261108	0	22.2405	6.9194	2.63189	11.9481
0.131117	6.37851	0.13339	0.128035	6.65911	1.71344	1.17942	1.2987
0.157158	8.94885	0.662372	0.0986554	34.2209	1.44687	5.72532	1.09091
0.268754	16.6643	0.974779	0.205385	16.6832	3.41378	3.37396	17.7662
0.079697	4.1929	0.222966	0.145919	42.3904	0.834613	1.26351	13.013
0.0296098	2.75766	0.0200821	0.0578275	1.91667	2.7987	3.27603	12.1039
0.112952	3.57097	0.125357	0.210567	17.2692	1.52201	4.93231	13.4026
0.214544	29.5574	0.785749	0.785628	148.52	2.74222	62.6431	3.2987
0.0617797	13.2092	0.0209503	0.120655	120.425	3.6275	5.66831	7.09091
0.316626	17.1388	1.61057	0.309183	8.01345	3.55198	22.9746	13.5065
0.155721	6.48	0.376249	0.0855341	6.16925	2.57159	3.99209	25.1948
0.303631	14.6903	0.259073	0.487779	91.3455	1.15722	2.6431	203.844
0.0674315	5.33715	0.137201	0.112879	76.333	1.5727	15.5971	1.14286
0.181913	18.524	0.17418	0.188085	78.4286	0.942467	25.5267	1.76623
0.333507	38.5243	0.466522	0.641157	7.21731	2.19407	5.25927	43.6623
0.054385	3.93135	0.154918	0	10.2557	1.07482	0.675097	1.92208
0.33495	11.1965	0.917422	0.603833	10.3216	4.89834	5.87519	15.1948
0.1256	13.7316	0.604038	0.836232	39.9817	2.28112	3.66667	2.28571
0.380496	6.87061	0.169353	0.174165	78.4353	1.09834	1.37974	0
0.135246	10.8787	0.254014	0.243816	22.757	4.17919	3.48123	17.3506
0.306265	5.27288	0	0.0345075	4.48864	0.733821	6.67532	43.8182
0.0198983	3.00455	0.0607299	0	12.5645	1.2396	2.41634	1.37662
0.0808286	16.0367	0.452264	0.147991	8.88473	4.01527	23.6114	1.42857
0.0730393	5.90506	0.297222	0.1834	30.5212	1.72591	3.63226	1.35065
0.0109518	19.7204	0.178267	0.224582	122.791	1.17632	143.78	1.22078
0.234351	16.6713	0.27815	0.0858159	112.521	1.65711	37.312	1.50649
0.051003	14.4928	0.249059	0.418354	85.3153	0.788855	6.41373	14.5714
0.0526998	13.8722	0.27879	0.524901	22.5404	3.26039	3.55531	1.01299
0.0565637	3.06831	0.0575443	0.124276	3.47145	2.39979	3.05279	0.961039
0.319899	14.677	1.39476	0.267753	10.9816	5.86572	10.5749	5.81818
0.191438	3.58781	0.184506	0.147582	42.7628	1.42852	3.77936	3.87013
0.0452581	5.23965	0.0920854	0.0994369	11.8152	1.09375	0.488523	0.805195
0.0874479	15.6252	0.635456	0.182983	29.6457	9.31214	5.29273	0.883117
0	5.78305	0.130736	0.0752926	38.8772	2.81579	1.49118	1.58442
0.26842	11.5335	0.78645	0.0629063	11.4872	2.32951	2.43379	1.2987
0.392873	18.8695	0.728835	0.169252	24.0904	5.73395	4.6461	88.0519
0.0103253	6.50637	0	0	0.441376	1.10903	1.47676	30.5195
0.375253	18.0188	1.92111	1.34752	13.2023	12.6897	7.54577	23.9221
0.105349	2.96849	0.34296	0.0925849	2.123	1.06364	1.44987	0
0.109299	15.425	0.289103	0.25615	135.507	2.13661	26.2798	12.3636
0.0360787	9.30114	0.048939	0.0352306	2.52636	2.14426	0.68152	22.961
0.010272	5.47132	0.0627004	0	4.0146	1.21363	1.88492	0
0.0559416	12.2713	0.159352	0.55719	68.0914	2.01889	36.4721	7.14286
0.193572	16.1613	0.568902	0.913604	40.782	9.97981	9.60565	7.71429
0.137927	8.98773	0.712385	0.124324	14.9796	4.03412	3.09214	1.4026
0.0461472	8.18191	0.305157	0.168984	24.7568	3.54397	5.32366	13.974
0.166521	27.6115	0.435619	1.35892	17.999	3.80711	11.7797	6.02597
0.144185	17.1794	0.398143	0.301704	40.1757	4.22565	59.197	19.5065
0.0905052	8.17201	0.265992	0.117837	56.8901	1.77139	47.381	1.61039
0.295901	20.8903	1.46903	0.208041	10.7262	4.67835	3.6731	1.76623
0.0951293	11.4347	0.193557	0.0557358	15.9871	2.49312	43.076	12.3117
0.0910155	14.2704	1.11112	0.499927	8.2537	10.509	11.0524	0.779221
0.0816548	9.68397	0.124606	0.0299007	29.7814	1.75408	20.2445	169.584
0.0100308	9.26648	0.163275	0.0293849	45.2062	2.0255	22.8729	7.2987
0.216033	19.9915	0.0293038	0	36.4641	2.56789	1.86552	1.16883
0.187173	17.2335	0.268826	0.322541	16.8628	5.74738	4.18931	1.8961
0.0698074	9.11184	0.101454	0.0292142	69.9486	2.27079	3.22934	12.1039
0.12964	22.7668	0.219812	0	60.4969	1.83338	61.8338	10.2597
0.160748	5.58069	0.239851	0.0627877	115.14	2.44022	3.84623	2.38961
0.0529018	6.0381	0.409024	0.247959	9.67875	1.93191	3.7688	1.24675
0.0590893	9.76523	0.0400758	0.288501	195.022	1.73476	28.5158	23.7143
0.352448	15.7775	0.565001	0.531889	92.9271	3.30379	19.0796	28.3117
0.0214126	3.99058	0.261406	0.313639	29.2773	0.689968	1.58903	1.8961
0.222486	7.08919	0.203709	0.130354	25.5835	1.5772	1.26081	1.81818
0.088917	23.2973	0.0226146	0.45584	69.014	1.6952	15.9564	11.5584
0.541804	12.0358	0.348124	0.501222	0.31345	5.05372	2.88568	1.94805
0.29845	3.68951	0.193215	0.079482	1.88882	1.36967	2.2697	33.6623
0	4.638	0.16222	0.166829	26.1799	1.22335	6.1471	7.4026
0.058708	4.61262	0.179177	0.0859919	122.384	3.67835	6.33704	2.44156
0.0868923	5.57871	0.0505135	0.109092	174.985	0.933297	0.334975	1.63636
0.00557475	3.75146	0.0453712	0.0653244	70.1157	1.90411	5.98739	2.46753
0.0388195	4.49232	0.0131642	0.0568605	0.458315	1.40375	5.48223	3.97403
0.00666103	2.13432	0	0.05854	35.2181	0.186017	18.4784	3.37662
0.26726	5.62545	1.83276	0.362469	13.6792	1.71173	1.41571	1.48052
0.139446	4.7545	0.411862	0.69841	69.8001	2.90857	1.48092	0.987013
0.40334	19.7087	0.52014	0.998514	36.3842	5.46713	16.4338	163.273
0.0936369	12.8167	0.154798	0.0685768	135.505	0.678874	1.15287	3.42857
3.15857	13.1945	0.195405	1.15662	2.77598	1.94844	23.6701	4.07792
0.371295	13.4681	0.700521	0.949265	11.2215	10.6589	11.0761	328.623
0.0485246	38.0236	0.0846271	1.05598	62.8633	1.96565	5.35006	51.3766
0.110514	17.3025	0.248529	0.494141	0.00710395	4.43568	251.42	0
0.0985772	7.95171	0.293144	0.133283	4.69546	1.77553	2.72153	24.026
0	3.56785	0.109171	0.696094	28.0288	2.23936	4.4058	1.45455
0.367611	10.4035	0.203991	0.358969	2.7619	3.44592	136.898	15.9481
0.115868	5.76295	0.255399	0.367719	1.56845	4.35582	7.76475	272.078
0.325884	16.7713	1.01039	0.454605	17.1905	10.8675	8.37534	1.97403
0.598537	8.49335	0.744228	0.487056	33.1936	3.9049	2.54241	1.22078
0.182725	1.46643	0.0232366	0	15.845	1.96262	0.801272	8.07792
0.0243553	4.58243	0.0247775	0.107022	308.341	1.72654	2.57966	0.909091
0.120265	2.40218	0.14682	0.0704625	12.5145	1.13674	13.5657	1.92208
0	5.83017	0.112598	0.0540385	137.625	3.02479	2.25663	3.35065
0.0714538	6.09971	0.174462	0.209322	88.9277	0.951669	0.578463	426.286
0.106406	6.5715	0.0962229	0.13854	66.1775	1.93022	4.2114	6.85714
0.152447	1.86913	0.193862	0.0558236	0.128005	0.880105	1.10559	69.013
0.318331	6.83227	0.526256	0.29142	1.02868	3.31942	4.67097	22.7532
0.387381	4.5854	0.765012	0.250329	8.2449	2.69229	3.01311	34.8571
0.0439836	6.22296	0.469834	2.60919	1.16839	4.29904	8.57547	1.68831
0.962004	11.2894	1.59489	0.278338	40.9632	2.06655	3.97413	10.2857
0.140267	23.0974	0.285396	0.582119	10.0932	1.53169	10.283	23.4545
0.255997	20.8429	0.729218	0.35997	44.7979	2.24369	2.37641	36.7532
0.320954	6.90817	0.382814	0.745698	14.7066	3.13825	4.3604	1.94805
0.010991	12.4501	0.111815	0.611757	14.5446	1.52287	8.28984	1.58442
0.0117668	9.1355	0.119708	0.448119	110.774	1.39025	4.2867	1.35065
0.124717	14.2267	0.197367	0.32476	16.4846	0.893042	0.78529	426.545
0.050892	3.51699	0.0517742	0.0372717	6.74398	0.491961	7.24437	27.2468
0.637873	15.3068	0.432621	0.311439	29.5653	2.32944	9.78286	38.2338
0.283983	3.28494	0.156491	0.190649	0.881552	0.940484	8.62132	432.857
0.102365	3.23953	0.110266	0.0881992	0.485384	2.72933	2.64863	332.701
0.0648655	2.48073	0.0439934	0.0950111	59.7473	1.14957	12.1363	1.87013
0.115535	4.0179	0.117538	0.169229	15.7759	4.64113	1.06004	1.11688
0.0597068	16.8596	0.182226	0.145758	169.143	0.983329	0.939873	1.35065
0.0439703	7.6108	0.447326	0.300557	215.796	0.645447	10.2835	5.48052
0.31416	10.5324	0.615091	0.382021	11.0475	1.51527	6.63822	27.2987
0.120375	40.6139	0.299352	2.29214	0.620749	1.24984	25.6261	160.935
0.0613637	44.3947	0.024971	0.19774	90.2575	6.10325	35.1884	137.896
0.174492	21.161	0.191173	1.86774	0.0655737	5.08916	15.7924	36.2078
0.23289	6.31613	0.16649	0.258148	24.8461	2.60961	2.73467	390.597
0.233208	12.1325	0.433831	0.761256	24.723	6.22635	20.5339	1.27273
0.0911376	4.95941	0.0855855	0.0410747	21.4657	1.46081	2.21345	1.92208
0.188502	7.6897	0.315355	0.220885	48.3217	2.68156	8.25192	1.48052
0.129742	5.05956	0.211186	0.0950189	45.5173	1.74192	20.3416	125.143
0.0611615	9.41026	0.271513	0.390919	51.0126	1.2183	139.464	2.67532
0.0333816	3.04279	0.0226402	0.130387	73.9709	0.908318	0.330299	3.32468
0.029151	4.91287	0	0	17.054	1.7534	1.14064	95.4805
0.343043	10.7062	0.283554	0.21983	30.1398	3.91486	34.6565	1.27273
0.0578137	5.57456	0.211738	0.0677456	1.01679	1.88774	120.847	41.039
0.149666	12.7166	2.1099	0.563713	26.7009	1.05638	2.04825	1.37662
0.333146	3.32579	0.42073	0.10096	5.23338	0.715654	0.651006	14.5455
0.0813661	10.5143	0.289718	0.11918	86.0843	0.546213	0.933171	1.8961
0.266841	4.55264	0.271467	0.195426	50.6781	0.57322	1.04412	163.74
0.50651	4.37286	0.351335	0.741905	18.4181	1.90412	2.82687	34.2857
0.135166	5.04611	0.154011	0.0316773	1.55179	1.59117	10.8112	1.27273
0.0631165	7.3103	0.128421	0	15.5587	0.949095	0.340645	1.09091
0.361442	1.71033	0.0294167	0.0635302	15.0179	0.559036	3.12117	10.5455
0.200692	5.16682	0.408342	0.407023	2.2123	2.53145	3.48552	1.11688
0.0117607	3.64249	0.287149	0.0689052	5.81733	0.757917	1.80899	17.3247
0.0763654	4.01195	0.194223	0	10.7608	1.27136	4.99732	1.61039
0.0239303	17.8818	0.170416	0.0350516	8.54891	2.82735	0.548903	9.35065
0.0297925	8.32992	0.10103	0.116368	30.674	2.7093	38.9653	2.28571
0.131682	12.8802	0.350369	0.326411	136.011	0.848624	5.27556	46.1558
0.0313079	14.424	0.222955	0.504437	64.4495	0.941565	4.09755	1.09091
0.0359905	5.80524	0.0732289	0.140578	54.4331	0.695824	5.82731	1.92208
0.00512348	8.63773	0.0208492	0	79.8772	1.12262	0.497733	2.5974
0.0303443	5.27934	0.0617408	0.29631	22.7553	1.6948	3.24812	15.1169
0.222597	8.91316	0.409777	0.450254	7.11384	6.14797	4.29062	1.16883
0.043162	5.65769	0.131731	0.189663	218.242	1.25171	2.06742	1.53247
0.203928	9.00123	0.601643	0.597402	28.3686	4.05216	31.1749	1.71429
0.297141	13.5866	0.529011	2.10363	1.81455	4.57455	19.3779	167.896
0.0807417	7.17919	0.093876	0.0337902	76.4957	1.53624	1.02717	26.1039
0.0523248	14.7595	0.039924	0.0766422	291.134	2.58526	1.83561	2.28571
0.0134525	4.88222	0.0136857	0.354679	96.6006	1.40156	10.691	2.02597
0.0315989	6.78123	0.0128587	0	4.08315	0.84171	2.14883	17.9481
0.0116729	5.88789	0.0475011	0.871986	11.8971	0.97794	13.4347	1.58442
0.0376533	1.2423	0.0638435	0.0183841	2.3377	1.26721	0.440306	1.87013
0.0546856	13.8136	0.435797	0.267001	9.84593	1.92853	1.5495	1.79221
0.223576	9.58693	0.598558	1.65464	53.3406	3.58945	5.98565	2.85714
0.0230468	10.0768	0	0.911455	1.53407	1.85657	168.776	6.36364
0.0695172	20.5692	0.433764	0.475181	9.40172	1.85175	5.01504	22.7532
0.300639	15.921	0.336436	0.220179	90.4065	1.51768	23.5949	43.9481
0.285411	12.5618	1.63258	1.2936	19.1129	0.983291	1.91822	3.2987
0.0311147	10.6973	0.189925	0.0911499	6.69463	4.53396	5.56963	31.4805
0.0239554	1.90826	0.0487413	0.0140353	237.42	1.89374	2.09448	1.45455
1.87316	30.4013	4.09359	0.551642	0.0484184	17.2452	9.33401	0.545455
0.585773	14.9247	0.409701	0.938443	7.512	8.29718	9.78078	1.11688
0.0113408	6.05408	0.0692244	0.89701	5.6789	2.38747	15.669	217.429
0.0494582	7.3621	0.100631	0.144887	90.5718	0.786211	2.37568	1.11688
0.0774079	1.39584	0.0787499	0.0755882	11.0614	1.49657	1.07926	14.4675
0.066457	2.12019	0.0676091	0.0648947	80.9096	1.40382	0.747237	452.312
0.246563	4.308	0.588923	0.188426	0.104744	3.98396	6.01717	26
0.040168	2.04759	0.0612965	0.0882533	91.2371	2.0709	24.0366	1.45455
0.0284367	18.4092	0.0867891	0.166609	48.1197	1.74098	2.14865	2.7013
0	4.24798	0.0638629	0.0919485	137.212	2.22504	16.3471	1.66234
0.0130423	5.52806	0.0132684	0	31.7945	3.39007	2.55165	3.11688
0.476903	16.9047	0.361057	0.324902	30.5318	1.90599	8.76916	74.2597
0.0968626	9.12671	0.197084	0.461105	259.008	2.1588	12.4159	2.1039
0.013795	1.2547	0.0561365	0.0404121	2.02181	1.18536	0.148905	1.50649
0.0772047	18.3795	0.132919	0.0695906	437.666	1.09715	2.16353	2.44156
0.104163	2.40462	0.0353229	0.135619	1.22978	0.671278	0.640255	2.98701
0.186099	5.66427	0.0378651	0.436139	14.8421	2.19875	3.16384	1.74026
0.207905	7.50254	0.344681	0.383477	14.5112	3.4075	5.36104	1.76623
0.0178294	3.9393	0.0483692	0.139282	126.249	0.893679	1.49151	1.19481
0.477783	11.765	0.65998	0.398067	69.4302	2.00564	8.51659	1.58442
0.0312747	1.62059	0.0530282	0.0305395	29.5964	0.85099	0.576707	3.27273
0.159921	12.6408	0.206078	0.0780806	137.64	2.15283	6.87606	1.14286
0.42154	15.2957	1.17255	0.687788	60.315	5.02059	10.7563	1.66234
0.358899	3.87292	0.309425	0.249482	128.151	2.88789	4.7112	1.19481
0.13269	4.33316	0.521964	0.233228	108.402	0.902632	2.19617	1.63636
0.121223	2.45015	0.448452	0.0645672	80.6425	1.30204	1.05572	1.37662
0.311163	13.6177	0.253246	2.83408	0.262571	6.34403	9.92357	16.0779
0.0720878	5.52012	0.0641703	0.118788	66.374	0.60007	0.936184	1.32468
0.224528	12.3791	0.26244	0.237909	41.3438	4.59747	18.5765	4.75325
0.0482124	3.2186	0.0686675	0.155361	57.8828	0.507485	1.86047	2.57143
0.0533014	10.7646	0.305634	0.59619	17.6596	1.31155	9.71546	1.35065
0.470972	21.9248	0.634152	1.17681	15.3871	2.08297	13.999	29.3506
0.195443	24.0206	0.211523	0.365455	84.1299	5.58304	117.893	58.6234
0.0167701	3.47929	0.0227478	0.0982553	12.3711	2.10146	4.69142	0.181818
0.302781	21.1845	0.267852	0.366366	21.6654	5.54276	6.60759	35.7403
0.25469	16.2912	0.181374	1.28704	43.4944	7.2493	10.1032	9.81818
0.0119646	2.05554	0.0324589	0.0584169	61.6422	0.711091	7.61975	2.15584
0.0625325	5.96265	0	0.109913	13.5334	1.77316	36.3817	2.18182
0.518773	20.4734	0.519254	3.26007	54.6581	2.56135	37.7529	47.3506
0.104257	7.76487	0.343445	0.232699	33.5977	3.09279	1.8756	2.05195
