# Supplementary material for: Identification of an immune checkpoint gene signature that accurately predicts prognosis and immunotherapy response in endometrial carcinoma
Source: Aging (Albany NY). 2021 Jun 22;13(12):16696–712. doi: 10.18632/aging.203189 (PMC8266314; doi:10.18632/aging.203189)
Supplement: Supplementary Table 2 [file aging-13-203189-s003.xlsx]

## Sheet:  Supplementary Table 2
Supplementary Table 2. The MMR gene mutations in EC samples.
Sample	MMR_Status
TCGA-AJ-A23O	Mut
TCGA-FI-A2F9	WT
TCGA-EY-A215	Mut
TCGA-AJ-A3BK	WT
TCGA-BK-A56F	WT
TCGA-D1-A17H	Mut
TCGA-E6-A8L9	WT
TCGA-D1-A15X	Mut
TCGA-AJ-A3NH	WT
TCGA-AJ-A8CT	Mut
TCGA-AX-A0IZ	WT
TCGA-E6-A1LX	Mut
TCGA-BS-A0UT	WT
TCGA-BG-A0MK	WT
TCGA-D1-A3DG	WT
TCGA-BG-A0M9	WT
TCGA-AX-A1CF	WT
TCGA-AX-A1CR	WT
TCGA-AX-A05W	WT
TCGA-A5-A0GP	WT
TCGA-EY-A1GX	WT
TCGA-B5-A11X	WT
TCGA-QS-A5YR	WT
TCGA-D1-A0ZV	WT
TCGA-AJ-A3OJ	WT
TCGA-B5-A0K3	WT
TCGA-BG-A0VT	WT
TCGA-B5-A11F	WT
TCGA-BS-A0U9	WT
TCGA-KP-A3W0	WT
TCGA-B5-A0K4	WT
TCGA-BG-A2L7	WT
TCGA-D1-A15V	WT
TCGA-DF-A2KZ	Mut
TCGA-A5-A0GI	WT
TCGA-EY-A210	WT
TCGA-BS-A0TD	WT
TCGA-AX-A2HA	Mut
TCGA-AP-A0LE	WT
TCGA-FI-A2F8	WT
TCGA-D1-A177	Mut
TCGA-A5-A0VP	Mut
TCGA-FI-A2EX	WT
TCGA-K6-A3WQ	WT
TCGA-D1-A16J	WT
TCGA-5B-A90C	WT
TCGA-B5-A3FA	Mut
TCGA-D1-A17L	WT
TCGA-AJ-A3NC	WT
TCGA-AP-A0LO	WT
TCGA-D1-A161	WT
TCGA-AW-A1PO	WT
TCGA-QF-A5YS	Mut
TCGA-KJ-A3U4	WT
TCGA-D1-A1O5	WT
TCGA-AJ-A2QO	WT
TCGA-AX-A2IO	WT
TCGA-BG-A0M0	WT
TCGA-B5-A0JY	Mut
TCGA-B5-A11H	Mut
TCGA-AX-A3FT	Mut
TCGA-FI-A2D2	WT
TCGA-AJ-A3BI	WT
TCGA-AX-A2H8	WT
TCGA-A5-A0GB	WT
TCGA-BG-A0YU	WT
TCGA-AP-A0LQ	WT
TCGA-EO-A1Y8	WT
TCGA-A5-A0VO	WT
TCGA-AX-A06J	WT
TCGA-B5-A0JS	WT
TCGA-AP-A05D	WT
TCGA-BS-A0V6	WT
TCGA-EY-A72D	WT
TCGA-AX-A3FS	WT
TCGA-AX-A1C8	WT
TCGA-DF-A2KU	Mut
TCGA-BG-A0MO	WT
TCGA-AJ-A3IA	WT
TCGA-BG-A0MH	WT
TCGA-AX-A2H2	WT
TCGA-BG-A0M3	WT
TCGA-BG-A221	Mut
TCGA-FI-A3PV	WT
TCGA-AP-A051	Mut
TCGA-B5-A0K0	WT
TCGA-D1-A176	WT
TCGA-D1-A1NZ	Mut
TCGA-D1-A165	WT
TCGA-A5-A1OF	Mut
TCGA-AP-A1DP	WT
TCGA-EY-A1GO	WT
TCGA-AX-A3FZ	WT
TCGA-BS-A0TJ	WT
TCGA-B5-A1N2	WT
TCGA-BS-A0U7	WT
TCGA-AP-A0LV	WT
TCGA-EC-A1QX	WT
TCGA-KP-A3VZ	WT
TCGA-AX-A064	WT
TCGA-BK-A26L	WT
TCGA-A5-A0GE	WT
TCGA-A5-A0R9	WT
TCGA-DF-A2L0	WT
TCGA-PG-A916	WT
TCGA-AP-A0LF	WT
TCGA-B5-A1MU	WT
TCGA-EY-A1GV	WT
TCGA-AP-A1DH	Mut
TCGA-AJ-A3BF	WT
TCGA-AX-A1C9	Mut
TCGA-D1-A17A	WT
TCGA-B5-A11M	WT
TCGA-AP-A0L9	WT
TCGA-EY-A1GP	WT
TCGA-FI-A2CY	WT
TCGA-BG-A0VW	Mut
TCGA-EO-A22U	Mut
TCGA-DI-A2QU	WT
TCGA-BK-A0C9	WT
TCGA-D1-A0ZS	WT
TCGA-BS-A0VI	WT
TCGA-BG-A0W2	WT
TCGA-DF-A2KV	WT
TCGA-AX-A3GB	WT
TCGA-B5-A11N	Mut
TCGA-B5-A3FB	WT
TCGA-EY-A1G8	Mut
TCGA-BG-A0M2	WT
TCGA-AP-A1DV	Mut
TCGA-DF-A2KN	Mut
TCGA-A5-A1OH	WT
TCGA-AJ-A6NU	WT
TCGA-EO-A22R	Mut
TCGA-EO-A2CG	WT
TCGA-BG-A0MU	WT
TCGA-A5-A3LP	WT
TCGA-BS-A0T9	WT
TCGA-EY-A1G7	WT
TCGA-EY-A1GH	WT
TCGA-B5-A3FC	Mut
TCGA-4E-A92E	WT
TCGA-D1-A169	WT
TCGA-BG-A0M4	Mut
TCGA-AX-A0IS	WT
TCGA-AX-A3FX	WT
TCGA-B5-A0JR	WT
TCGA-A5-A0G3	WT
TCGA-EC-A24G	Mut
TCGA-AJ-A3QS	WT
TCGA-BG-A0VZ	WT
TCGA-AX-A3G9	Mut
TCGA-EY-A3QX	WT
TCGA-BG-A0YV	WT
TCGA-EY-A549	Mut
TCGA-AX-A3G7	WT
TCGA-B5-A11E	Mut
TCGA-QS-A5YQ	Mut
TCGA-BS-A0TA	WT
TCGA-AX-A3G3	WT
TCGA-E6-A2P8	WT
TCGA-AJ-A3NE	WT
TCGA-D1-A3DH	WT
TCGA-B5-A1MY	WT
TCGA-BG-A0MI	WT
TCGA-AP-A5FX	WT
TCGA-BS-A0TG	WT
TCGA-A5-A1OG	WT
TCGA-PG-A917	Mut
TCGA-AX-A2IN	WT
TCGA-A5-A0GQ	WT
TCGA-D1-A17C	WT
TCGA-B5-A0K9	WT
TCGA-AX-A1CJ	WT
TCGA-BG-A18C	WT
TCGA-AX-A063	WT
TCGA-E6-A1M0	WT
TCGA-EO-A3AV	Mut
TCGA-B5-A0K2	WT
TCGA-AP-A0LT	WT
TCGA-D1-A0ZU	WT
TCGA-BS-A0UF	Mut
TCGA-AX-A2H4	WT
TCGA-AX-A06D	WT
TCGA-A5-A0GU	WT
TCGA-AP-A0LL	WT
TCGA-A5-A2K5	Mut
TCGA-AP-A054	Mut
TCGA-BS-A0UV	Mut
TCGA-DF-A2KY	WT
TCGA-AX-A0IU	WT
TCGA-D1-A1O8	WT
TCGA-A5-A0RA	WT
TCGA-DF-A2KS	WT
TCGA-EY-A1GQ	WT
TCGA-EO-A3B0	Mut
TCGA-EO-A3KU	WT
TCGA-AP-A0LM	Mut
TCGA-BS-A0UM	WT
TCGA-D1-A3JP	WT
TCGA-D1-A16E	WT
TCGA-EO-A2CH	WT
TCGA-SL-A6J9	WT
TCGA-D1-A175	WT
TCGA-B5-A11Z	WT
TCGA-BG-A2AE	WT
TCGA-AX-A2HG	WT
TCGA-EY-A1GW	WT
TCGA-DI-A1NO	WT
TCGA-BS-A0UJ	Mut
TCGA-PG-A5BC	WT
TCGA-A5-A0R8	WT
TCGA-EO-A22X	Mut
TCGA-A5-A0GM	WT
TCGA-AJ-A3EJ	WT
TCGA-AJ-A4ZG	WT
TCGA-AX-A1C4	WT
TCGA-BG-A3PP	WT
TCGA-A5-A0G2	Mut
TCGA-A5-A7WK	WT
TCGA-BG-A3EW	WT
TCGA-BS-A0TC	WT
TCGA-AX-A2HF	WT
TCGA-EY-A1GE	WT
TCGA-AP-A05N	WT
TCGA-AX-A2HD	Mut
TCGA-FI-A2EU	WT
TCGA-BG-A186	WT
TCGA-D1-A16Q	WT
TCGA-EY-A1GD	Mut
TCGA-D1-A0ZZ	WT
TCGA-AJ-A3TW	WT
TCGA-AX-A1CE	Mut
TCGA-D1-A17B	WT
TCGA-D1-A1NY	WT
TCGA-A5-A0GR	WT
TCGA-BK-A0CC	WT
TCGA-D1-A0ZR	WT
TCGA-A5-A7WJ	Mut
TCGA-BG-A0M7	WT
TCGA-BS-A0TI	WT
TCGA-BG-A0LW	Mut
TCGA-BS-A0U8	WT
TCGA-AP-A059	Mut
TCGA-D1-A1NU	WT
TCGA-B5-A1MZ	WT
TCGA-AX-A05T	WT
TCGA-D1-A2G6	WT
TCGA-DI-A1C3	WT
TCGA-B5-A11Q	WT
TCGA-DF-A2KR	WT
TCGA-D1-A1O7	Mut
TCGA-DI-A1NN	WT
TCGA-BS-A0V7	WT
TCGA-AJ-A23N	WT
TCGA-EY-A1GS	WT
TCGA-AX-A3FW	WT
TCGA-D1-A17S	WT
TCGA-B5-A11L	WT
TCGA-D1-A17N	WT
TCGA-EO-A22T	Mut
TCGA-A5-A2K2	WT
TCGA-PG-A915	WT
TCGA-AX-A06L	WT
TCGA-EO-A22Y	WT
TCGA-AP-A05O	WT
TCGA-EY-A1GC	WT
TCGA-B5-A11V	WT
TCGA-D1-A17T	WT
TCGA-DI-A0WH	WT
TCGA-B5-A0JV	Mut
TCGA-D1-A179	WT
TCGA-D1-A17K	WT
TCGA-A5-A0G5	WT
TCGA-B5-A1MS	WT
TCGA-B5-A11R	Mut
TCGA-AX-A060	WT
TCGA-AJ-A2QM	WT
TCGA-B5-A0JZ	WT
TCGA-D1-A0ZN	WT
TCGA-EO-A3AY	Mut
TCGA-AP-A0LH	WT
TCGA-D1-A2G7	WT
TCGA-AX-A06B	Mut
TCGA-B5-A1MW	Mut
TCGA-B5-A11I	WT
TCGA-EO-A3AU	Mut
TCGA-AX-A1CP	WT
TCGA-D1-A160	WT
TCGA-B5-A11U	WT
TCGA-BG-A187	WT
TCGA-AJ-A8CW	Mut
TCGA-AX-A05U	WT
TCGA-D1-A16F	WT
TCGA-H5-A2HR	WT
TCGA-EY-A1GM	WT
TCGA-BS-A0WQ	WT
TCGA-AX-A062	WT
TCGA-BG-A0MT	WT
TCGA-AJ-A3EL	Mut
TCGA-DI-A1BY	WT
TCGA-EY-A212	WT
TCGA-B5-A11O	WT
TCGA-D1-A16D	WT
TCGA-E6-A1LZ	WT
TCGA-B5-A11S	WT
TCGA-AX-A1CK	WT
TCGA-BS-A0V4	WT
TCGA-EO-A3AZ	Mut
TCGA-A5-A0GA	Mut
TCGA-5S-A9Q8	WT
TCGA-A5-AB3J	WT
TCGA-AP-A053	WT
TCGA-D1-A17R	WT
TCGA-AP-A0LS	WT
TCGA-AX-A2HK	WT
TCGA-AX-A1CN	WT
TCGA-AP-A05H	WT
TCGA-D1-A103	Mut
TCGA-AJ-A3BG	Mut
TCGA-D1-A101	WT
TCGA-BK-A4ZD	WT
TCGA-AP-A052	WT
TCGA-AJ-A8CV	WT
TCGA-BK-A6W3	Mut
TCGA-B5-A0K1	WT
TCGA-EY-A214	WT
TCGA-D1-A2G5	WT
TCGA-AJ-A3OK	Mut
TCGA-B5-A0K6	WT
TCGA-D1-A17F	Mut
TCGA-AX-A06H	WT
TCGA-EO-A1Y7	WT
TCGA-B5-A11G	Mut
TCGA-D1-A167	WT
TCGA-BS-A0UL	WT
TCGA-AP-A1E3	WT
TCGA-AP-A1DK	Mut
TCGA-D1-A16X	Mut
TCGA-KP-A3W4	WT
TCGA-D1-A17U	WT
TCGA-D1-A102	WT
TCGA-AJ-A2QN	WT
TCGA-AX-A1CI	WT
TCGA-BG-A0W1	WT
TCGA-BG-A0MC	WT
TCGA-BG-A0M6	Mut
TCGA-B5-A0K7	WT
TCGA-AX-A05S	WT
TCGA-AJ-A5DW	Mut
TCGA-BG-A0VX	WT
TCGA-D1-A17M	WT
TCGA-EO-A3B1	WT
TCGA-SJ-A6ZJ	WT
TCGA-AX-A1C7	WT
TCGA-D1-A0ZO	WT
TCGA-AP-A1DR	WT
TCGA-A5-A0R6	WT
TCGA-B5-A1MR	Mut
TCGA-EO-A1Y5	WT
TCGA-PG-A914	WT
TCGA-SJ-A6ZI	Mut
TCGA-A5-A0GV	WT
TCGA-A5-A2K4	WT
TCGA-AP-A056	Mut
TCGA-EY-A4KR	WT
TCGA-A5-A2K7	WT
TCGA-AP-A1DO	WT
TCGA-AP-A0LG	WT
TCGA-B5-A5OC	Mut
TCGA-D1-A15W	WT
TCGA-BG-A0LX	WT
TCGA-AX-A3G4	WT
TCGA-FI-A2D5	Mut
TCGA-A5-A1OJ	WT
TCGA-B5-A3S1	WT
TCGA-AJ-A3EK	Mut
TCGA-B5-A3FH	WT
TCGA-BS-A0V8	WT
TCGA-AX-A3GI	WT
TCGA-AP-A3K1	WT
TCGA-AJ-A3BH	Mut
TCGA-D1-A17Q	Mut
TCGA-AX-A2H7	WT
TCGA-AX-A3G1	WT
TCGA-BK-A13B	WT
TCGA-AJ-A3EM	WT
TCGA-B5-A3F9	WT
TCGA-AX-A0J1	Mut
TCGA-EY-A3L3	WT
TCGA-AP-A1DM	Mut
TCGA-EO-A3KW	WT
TCGA-D1-A16I	WT
TCGA-B5-A5OD	WT
TCGA-B5-A0JX	WT
TCGA-AJ-A2QK	WT
TCGA-AP-A05J	WT
TCGA-AX-A1CC	WT
TCGA-AX-A2HH	WT
TCGA-JU-AAVI	WT
TCGA-AJ-A3OL	WT
TCGA-A5-A0GN	WT
TCGA-AX-A3FV	WT
TCGA-A5-A0GG	WT
TCGA-D1-A174	Mut
TCGA-B5-A11Y	WT
TCGA-QF-A5YT	WT
TCGA-BS-A0UA	WT
TCGA-AP-A1E4	WT
TCGA-A5-A2K3	Mut
TCGA-BG-A0MA	WT
TCGA-B5-A0JN	WT
TCGA-AP-A05P	WT
TCGA-A5-A0GH	WT
TCGA-D1-A16S	WT
TCGA-D1-A1NW	WT
TCGA-BG-A0MG	WT
TCGA-A5-A0G1	Mut
TCGA-AP-A0LD	WT
TCGA-AP-A05A	Mut
TCGA-D1-A3JQ	WT
TCGA-BG-A0MS	Mut
TCGA-BG-A0M8	WT
TCGA-A5-A0VQ	WT
TCGA-FI-A2D0	Mut
TCGA-BG-A18A	WT
TCGA-A5-A0R7	WT
TCGA-AJ-A5DV	WT
TCGA-BG-A0VV	WT
TCGA-A5-A0GD	WT
TCGA-FI-A2F4	Mut
TCGA-EY-A547	WT
TCGA-AP-A0LI	WT
TCGA-AX-A2HC	Mut
TCGA-AX-A1CA	WT
TCGA-AJ-A3NF	WT
TCGA-D1-A0ZP	WT
TCGA-QS-A744	WT
TCGA-A5-A0G9	WT
TCGA-BS-A0TE	WT
TCGA-B5-A11W	WT
TCGA-D1-A163	WT
TCGA-BK-A0CB	WT
TCGA-AJ-A2QL	WT
TCGA-D1-A0ZQ	WT
TCGA-B5-A121	WT
TCGA-EY-A1H0	WT
TCGA-AJ-A3BD	WT
TCGA-BK-A6W4	WT
TCGA-D1-A3DA	WT
TCGA-D1-A162	WT
TCGA-B5-A3FD	WT
TCGA-B5-A5OE	WT
TCGA-EY-A2OQ	WT
TCGA-B5-A0JT	WT
TCGA-AP-A0L8	WT
TCGA-AP-A0LP	WT
TCGA-EO-A3L0	WT
TCGA-D1-A1NS	WT
TCGA-EY-A1GL	WT
TCGA-EY-A54A	WT
TCGA-D1-A168	WT
TCGA-D1-A16N	Mut
TCGA-AJ-A3NG	WT
TCGA-SL-A6JA	WT
TCGA-A5-A0GW	WT
TCGA-B5-A0KB	WT
TCGA-DI-A2QT	WT
TCGA-EO-A3KX	Mut
TCGA-EY-A2ON	WT
TCGA-EY-A1GT	WT
TCGA-EY-A1GJ	WT
TCGA-AX-A0IW	WT
TCGA-BG-A0RY	WT
TCGA-EY-A5W2	WT
TCGA-D1-A16G	WT
TCGA-BK-A0CA	WT
TCGA-AX-A1C5	WT
TCGA-D1-A17D	WT
TCGA-EY-A2OM	Mut
TCGA-AP-A0LJ	WT
TCGA-BG-A222	Mut
TCGA-PG-A6IB	WT
TCGA-EY-A1GK	Mut
TCGA-AP-A1E0	Mut
TCGA-A5-A1OK	WT
TCGA-D1-A1O0	WT
TCGA-DI-A1BU	Mut
TCGA-D1-A16B	WT
TCGA-AJ-A23M	WT
TCGA-B5-A11J	WT
TCGA-2E-A9G8	WT
TCGA-E6-A2P9	Mut
TCGA-BK-A139	WT
TCGA-D1-A16O	WT
TCGA-EC-A1NJ	WT
TCGA-EY-A2OO	WT
TCGA-A5-A0GX	WT
TCGA-AX-A05Y	WT
TCGA-EO-A3AS	WT
TCGA-EY-A1GU	WT
TCGA-B5-A11P	WT
TCGA-EY-A1GI	Mut
TCGA-D1-A16Y	WT
TCGA-AX-A3G6	WT
TCGA-BK-A13C	WT
TCGA-A5-A0GJ	WT
TCGA-AX-A3G8	Mut
TCGA-AX-A0J0	Mut
TCGA-AX-A2HJ	WT
TCGA-QS-A8F1	WT
TCGA-B5-A1MV	WT
TCGA-AX-A06F	Mut
TCGA-KP-A3W1	WT
TCGA-EO-A22S	WT
TCGA-B5-A0K8	WT
TCGA-EY-A2OP	WT
TCGA-BG-A0MQ	WT
TCGA-D1-A15Z	WT
TCGA-AX-A05Z	Mut
TCGA-PG-A7D5	WT
TCGA-EY-A1GF	Mut
TCGA-AP-A1DQ	WT
TCGA-FI-A2EY	WT
TCGA-FI-A2EW	WT
TCGA-FI-A3PX	WT
TCGA-B5-A1MX	Mut
TCGA-BG-A18B	WT
TCGA-FI-A2CX	WT
TCGA-D1-A1NX	WT
TCGA-DI-A2QY	WT
TCGA-D1-A2G0	Mut
TCGA-B5-A0JU	WT
TCGA-FI-A2D4	WT
TCGA-EY-A548	Mut
TCGA-BG-A220	WT
TCGA-KP-A3W3	WT
TCGA-D1-A16V	WT
TCGA-BG-A2AD	WT
TCGA-AJ-A3I9	WT
TCGA-AP-A0LN	WT
TCGA-EY-A1GR	WT
TCGA-BS-A0U5	WT
TCGA-FI-A2D6	WT
TCGA-A5-A3LO	WT
TCGA-AP-A1E1	WT
TCGA-D1-A16R	WT
TCGA-AX-A2H5	WT
