# Supplementary material for: Identification of an immune checkpoint gene signature that accurately predicts prognosis and immunotherapy response in endometrial carcinoma
Source: Aging (Albany NY). 2021 Jun 22;13(12):16696–712. doi: 10.18632/aging.203189 (PMC8266314; doi:10.18632/aging.203189)
Supplement: Supplementary Table 3 [file aging-13-203189-s004.xlsx]

## Sheet:  Supplementary Table 3
Supplementary Table 3. The relationship between neoantigens and expression levels of ICGs in EC tissues.
VTCN1	TNFRSF18	TNFRSF14	TNFRSF4	CD40LG	TMIGD2	BTLA	SNV.Neoantigens
TCGA-2E-A9G8	54.8245	2.49483	8.44813	2.14703	0.20336	0.347691	0.387295	22
TCGA-5B-A90C	20.4316	3.08851	2.16902	0.720945	0.0175091	0.063023	0.103264	22
TCGA-5S-A9Q8	3.23993	1.52646	19.4456	1.50845	0.198438	0.228565	0.234067	17
TCGA-A5-A0G1	3.52606	40.9173	46.5654	12.2052	1.4333	1.55618	1.46662	4842
TCGA-A5-A0G2	1.5315	3.90442	3.10279	1.47347	0.13084	0.0627934	0.17148	11244
TCGA-A5-A0G3	7.24858	2.32955	15.927	1.9869	0	0	0	27
TCGA-A5-A0G5	116.943	9.17508	14.2279	9.28126	1.20837	1.6093	0.593889	48
TCGA-A5-A0G9	71.9237	6.60801	8.24421	1.95016	0.243043	0.279942	0.0119451	149
TCGA-A5-A0GA	32.4422	5.1084	8.43409	0.670546	0.0614631	0.0589954	0.070485	149
TCGA-A5-A0GB	1.47394	3.15568	0.839768	1.58763	0.190348	0.137029	0.0935521	311
TCGA-A5-A0GD	58.2202	7.93116	12.5952	1.23245	0.286713	0.619205	0.0704568	NA
TCGA-A5-A0GE	15.4645	4.92259	7.96723	2.53558	0.567654	0.471517	0.236069	10
TCGA-A5-A0GG	17.5666	4.34274	7.60024	2.47274	0.386559	0.0982164	0.301742	NA
TCGA-A5-A0GH	0.398227	25.3462	10.3168	1.58161	0.0856025	0.0308122	0.0315539	155
TCGA-A5-A0GI	40.4198	2.37126	8.20189	4.24105	0.48761	0.367741	0.205415	154
TCGA-A5-A0GJ	12.1457	12.1776	13.9796	10.9147	0.884175	0.636508	0.133709	21
TCGA-A5-A0GM	10.1765	3.7247	6.79755	5.76687	0.231885	0.296767	0.0633148	22
TCGA-A5-A0GN	24.5712	5.67954	10.5889	16.2563	0.976116	0.362681	0.170231	33
TCGA-A5-A0GP	33.5955	2.3678	13.2476	1.36256	0.150567	0.216783	0.0634291	828
TCGA-A5-A0GQ	69.3269	55.3602	24.6801	5.32707	0.796677	0.173794	0.201708	NA
TCGA-A5-A0GR	17.6814	6.02042	26.6897	6.15685	1.12655	0.62017	0.521107	NA
TCGA-A5-A0GU	80.3019	2.39866	9.8471	1.88956	0.904284	0.18987	0.175923	22
TCGA-A5-A0GV	58.9532	0.637262	15.8845	2.33354	0.21622	0.17295	0.0944603	24
TCGA-A5-A0GW	9.13865	12.407	8.0804	9.85504	0.917131	0.674904	0.590985	134
TCGA-A5-A0GX	6.80289	3.31717	10.7024	3.96094	1.1724	0.0750217	0.0512185	16
TCGA-A5-A0R6	85.1368	6.59684	8.13085	3.78101	0.198958	0.322262	0.0611149	29
TCGA-A5-A0R7	19.3792	4.09932	8.09652	6.43711	1.37606	0.518166	0.156071	20
TCGA-A5-A0R8	50.9589	50.6204	15.1804	2.69523	1.05116	1.11707	0.172209	15
TCGA-A5-A0R9	27.7047	3.2979	7.79138	3.13428	0.126867	0.109596	0.224469	21
TCGA-A5-A0RA	58.6572	10.7724	9.07645	0.353624	0.16747	0.6028	0.123462	39
TCGA-A5-A0VO	35.2216	9.64109	7.81182	1.94268	0.658779	0.0981202	0.234459	20
TCGA-A5-A0VP	38.1328	1.96666	11.5806	1.491	0.32952	0.203329	0.034704	520
TCGA-A5-A0VQ	16.8967	5.25307	25.6625	7.5481	0.597851	0.107597	0.257102	173
TCGA-A5-A1OF	10.7057	4.27623	19.4855	3.37342	0.639038	0.292751	0.32835	4804
TCGA-A5-A1OG	18.7855	4.57328	11.2766	2.13412	0.33293	0.205434	0.292194	19
TCGA-A5-A1OH	1.44837	1.1816	3.5113	3.74284	0.0185607	0.227148	0.0364888	63
TCGA-A5-A1OJ	12.1143	4.81498	9.05223	2.04742	1.28531	0.844118	0.166238	15
TCGA-A5-A1OK	137.037	0.926191	7.87928	0.932459	0.410788	0.236577	0.0201894	34
TCGA-A5-A2K2	44.4391	2.00061	20.0411	0.558801	0.0264638	0.209561	0.0520258	58
TCGA-A5-A2K3	23.0928	39.6912	42.9682	30.2065	0.970947	1.14942	1.68611	528
TCGA-A5-A2K4	170.912	29.3643	8.9729	2.92551	0.285244	0.215123	0.140192	14
TCGA-A5-A2K5	8.30721	3.89187	5.18154	2.6652	0.243468	0.276742	0.113362	4951
TCGA-A5-A2K7	95.6093	13.6769	12.6215	1.55719	0.0487575	0.0877501	0.035945	200
TCGA-A5-A3LO	17.5118	99.9617	5.55215	0.651046	0.199759	0.0625238	0.0981777	12
TCGA-A5-A3LP	103.982	3.39548	3.23532	2.06251	0.123381	0.0888208	0.0202131	27
TCGA-A5-A7WJ	11.1553	33.6691	8.90284	1.22844	0.130185	0.0234298	0.0279928	NA
TCGA-A5-A7WK	128.397	1.40075	14.174	0.828098	0.124253	0.11181	0.0229004	39
TCGA-A5-AB3J	11.3928	2.75476	11.6912	2.49501	1.64257	0.19835	0.260416	23
TCGA-AJ-A23M	45.7306	1.76147	3.69305	1.90991	0.320583	0.0329691	0.0787799	39
TCGA-AJ-A23N	164.335	1.98805	4.12583	3.33886	0.155381	0.0789578	0.0404293	21
TCGA-AJ-A23O	64.3876	11.8262	10.3999	3.49237	1.24644	0.414136	0.388764	354
TCGA-AJ-A2QK	45.0639	4.81558	15.3325	6.03973	2.53379	0.639357	0.50069	36
TCGA-AJ-A2QL	56.6476	6.83305	5.09849	1.84239	0.249293	2.79165	0.0952951	9
TCGA-AJ-A2QM	226.644	80.9877	8.94843	0.484435	0.0509822	0.0367015	0.0313209	86
TCGA-AJ-A2QN	31.6375	1.18193	2.68739	0.873668	0.127309	0.274945	0.0312849	30
TCGA-AJ-A2QO	98.3853	1.56226	5.9228	1.34393	0.132992	0.205156	0.042019	305
TCGA-AJ-A3BD	116.212	3.96188	11.44	4.56095	0.260424	1.32336	0.173167	46
TCGA-AJ-A3BF	44.6114	2.14848	5.17162	4.32441	0.302915	0.17066	0.148877	7
TCGA-AJ-A3BG	33.4678	3.44473	27.4508	1.11093	0.0932361	0.115062	0.0130925	462
TCGA-AJ-A3BI	20.2846	13.9136	14.892	5.93579	0.131583	2.35951	0.211648	29
TCGA-AJ-A3BK	63.1114	5.31542	24.2837	6.96543	0.209638	3.51545	0.151518	25
TCGA-AJ-A3EJ	210.451	5.13986	4.54975	1.58287	0.226301	0.162911	0.090368	29
TCGA-AJ-A3EK	41.9762	3.47657	13.4326	2.28289	0.712704	0.417411	0.356216	3217
TCGA-AJ-A3EL	15.9539	2.76801	15.022	2.08173	0.922454	0.282227	0.402363	3492
TCGA-AJ-A3EM	9.35176	25.9391	0.658977	0.19844	0.010442	0.0150341	0.0307921	25
TCGA-AJ-A3I9	28.5299	1.53407	6.78041	1.2434	0.105152	0.0756981	0	17
TCGA-AJ-A3IA	113.561	4.07297	3.13904	1.71147	0.576371	0.350092	0.336389	107
TCGA-AJ-A3NC	56.7414	40.5327	10.2871	2.60443	0.491081	0.246645	0.432196	NA
TCGA-AJ-A3NE	3.71839	2.88732	8.15597	2.18353	0.158328	0.384678	0.043771	NA
TCGA-AJ-A3NF	20.8357	2.90078	6.23512	2.77292	1.22627	0.303044	0.634171	11
TCGA-AJ-A3NG	40.3791	1.82626	2.2256	0.857362	0.114748	0.0508344	0.0260291	42
TCGA-AJ-A3OJ	30.026	7.52007	11.5187	1.38793	0.119509	0.13383	0.0783152	321
TCGA-AJ-A3OK	0.924846	2.58953	9.26697	1.96323	2.0853	0.573701	0.979187	323
TCGA-AJ-A3OL	43.2762	15.643	4.16467	0.86963	0.01144	0.510605	0.00562255	98
TCGA-AJ-A3QS	358.935	1.34812	8.87045	1.28997	0.616043	0.487831	0.645915	95
TCGA-AJ-A3TW	27.7191	4.54875	13.5886	5.52742	0.309849	0.66148	0.152285	60
TCGA-AJ-A5DV	56.4439	2.48103	11.7296	0.500168	0.291533	0.0699573	0.250745	40
TCGA-AJ-A5DW	17.4334	0.756758	2.57397	0.963866	0.251059	0	0.20752	1642
TCGA-AJ-A8CT	11.7594	6.44023	30.0536	4.7448	1.40528	3.14512	1.1078	304
TCGA-AJ-A8CV	58.4253	10.0173	18.1859	2.40002	0.23221	0.316734	0.330366	82
TCGA-AP-A051	11.6342	1.64973	3.66065	2.1251	0.11308	0.260495	0.222305	3297
TCGA-AP-A052	4.8865	1.90286	3.27147	5.07118	0.12476	0.0449066	0.0306584	25
TCGA-AP-A054	1.96787	17.552	1.52195	1.2316	0.0603376	0.376449	0.0296547	560
TCGA-AP-A056	20.894	9.11103	4.20383	5.53956	0.243412	0.311519	0.186094	4192
TCGA-AP-A059	20.2041	8.22251	28.6853	3.68929	0.991951	1.39573	0.675885	3479
TCGA-AP-A05A	34.5742	8.3697	3.28131	1.35512	0	0.153999	0	26
TCGA-AP-A05D	70.6655	4.80217	4.2881	3.86365	0.677688	0.334533	0.0570977	NA
TCGA-AP-A05H	12.96	2.62175	2.26521	0.433671	0	0	0.0126175	39
TCGA-AP-A05J	48.3067	1.18562	1.73925	2.23084	0.142219	0.058504	0.00998541	25
TCGA-AP-A05N	12.2197	1.03216	8.7002	2.42171	0.04096	0.17692	0.100655	100
TCGA-AP-A05O	26.8075	2.8063	11.2987	0.285185	0.135059	0.324091	0.276578	NA
TCGA-AP-A05P	7.71441	5.13647	5.38742	4.29231	0.269751	0.610313	0.189396	28
TCGA-AP-A0L8	59.1401	3.78208	0.477003	1.26404	0.0217683	0.0940247	0.0213974	33
TCGA-AP-A0L9	49.7006	6.90684	6.24593	0.600642	0	0.0945116	0.0215082	28
TCGA-AP-A0LD	1.05036	69.8437	10.8579	3.49693	0.104156	0.329917	0.0307144	176
TCGA-AP-A0LE	3.73049	4.66351	10.7592	6.47508	0.163546	0.274715	0.0267932	193
TCGA-AP-A0LF	35.5799	41.0857	19.699	2.8324	0.50618	0.364393	0.422921	145
TCGA-AP-A0LG	55.0564	1.52175	8.24392	1.18666	0.0702479	0.0674276	0.414305	151
TCGA-AP-A0LH	35.5239	23.8342	14.5788	5.05631	0.387694	0.459689	0.0560423	15
TCGA-AP-A0LI	38.8703	24.4854	16.0644	10.6436	0.927725	0.801431	0.273575	33
TCGA-AP-A0LJ	14.1899	5.71117	14.0997	4.76585	0.801838	0.342065	0.0729791	12
TCGA-AP-A0LL	13.902	4.76283	18.7259	12.2097	0.2739	0.131452	0.044872	18
TCGA-AP-A0LM	2.57794	6.06106	13.1751	3.982	1.29391	0.396371	0.649461	6433
TCGA-AP-A0LN	4.00598	1.58653	9.03184	2.3265	0.440716	0.0906475	0.0464149	30
TCGA-AP-A0LO	14.9645	2.11637	3.8597	2.51329	0.392391	0.338974	0.0899977	22
TCGA-AP-A0LP	85.922	21.4334	25.9328	2.92574	0.823118	0.632057	0.188788	117
TCGA-AP-A0LS	39.7578	4.41546	2.47013	1.41059	0.175222	0	0.226059	152
TCGA-AP-A0LT	54.7148	9.59978	12.5835	1.18663	0.134872	0.258915	0.0773348	200
TCGA-AP-A0LV	8.32285	8.47583	4.59863	1.28745	0.248401	0.357643	0.0443943	6
TCGA-AP-A1DH	0.440185	14.7329	14.5692	4.7027	0.516039	1.25134	0.427154	272
TCGA-AP-A1DK	15.7437	10.3524	13.0136	10.6327	1.25545	1.72898	0.684097	4958
TCGA-AP-A1DM	19.7953	4.96481	12.5712	3.43468	0.111411	0.192489	0.0985614	109
TCGA-AP-A1DO	1.66795	49.8802	13.8391	1.43273	0.0430804	0	0.0317597	217
TCGA-AP-A1DP	28.2834	1.16855	10.2297	1.01111	0.191537	0.551543	0.0753093	215
TCGA-AP-A1DQ	52.1803	0.928368	6.02034	3.76442	0.153121	0.0629885	0.279521	13
TCGA-AP-A1DR	88.1789	3.07798	4.73988	1.86123	0.0669452	0.0963862	0.0438696	328
TCGA-AP-A1DV	26.0768	2.657	9.15513	1.79324	0	0.815151	0.128427	NA
TCGA-AP-A1E0	2.1873	7.17775	5.0649	1.34309	0.495916	0.372526	0.0423883	2125
TCGA-AP-A1E1	40.5855	3.09218	18.6102	3.20238	0.497985	0.456265	0.411624	220
TCGA-AP-A1E3	0.17889	3.6181	3.35561	4.16296	0.298018	0.69313	0.0338008	21
TCGA-AP-A1E4	0.958818	2.1847	1.18131	1.84453	0	0.0359343	0.0490658	12
TCGA-AP-A3K1	53.8647	14.1108	4.18178	4.41015	0.0122857	0.0884436	0.0120764	NA
TCGA-AP-A5FX	64.4392	2.73728	11.2115	1.80546	0.457003	0.106126	0.0869448	17
TCGA-AX-A05S	105.877	16.9644	11.853	4.52082	0	0.316158	0.134904	203
TCGA-AX-A05T	90.8059	0.186898	4.30249	0.297559	0	0	0.0692588	25
TCGA-AX-A05U	15.8194	0.269163	4.33698	1.5917	0.0289923	0.16697	0.0854947	8
TCGA-AX-A05W	16.396	3.04093	8.49643	1.71406	0.256341	0.266554	0.0629933	42
TCGA-AX-A05Y	3.99842	0.452276	6.28685	1.1041	1.1026	0.180026	0.195534	84
TCGA-AX-A05Z	4.60486	9.16227	18.2652	5.4066	0.662711	0.780674	0.148049	4791
TCGA-AX-A060	33.579	1.44316	4.02347	1.09232	0.0178381	0	0.0175342	370
TCGA-AX-A062	17.5822	75.1774	4.65928	3.43607	0.108484	0.390483	0	6
TCGA-AX-A063	42.0202	7.63682	15.9916	14.6176	2.91139	0.838352	1.17651	489
TCGA-AX-A064	30.5706	76.9406	19.3376	2.65528	0.251499	0.362103	0.0618034	108
TCGA-AX-A06B	100.308	3.35189	3.72771	2.62523	0.89678	0.469514	0.290494	20
TCGA-AX-A06F	25.129	4.0687	5.25373	6.62726	0.89673	0.543618	0.11598	4018
TCGA-AX-A06H	11.2854	4.11771	13.2958	4.79545	2.84599	2.81451	0.974883	182
TCGA-AX-A06J	18.6885	3.9026	4.95723	1.42806	0.35595	0.614988	0.0116628	24
TCGA-AX-A06L	24.7397	8.22216	19.5216	4.84833	0.80363	1.32234	0.225696	19
TCGA-AX-A0IS	20.6479	1.56216	7.06523	1.29431	0.192302	0.173045	0.200839	22
TCGA-AX-A0IU	20.4767	2.31936	8.54288	2.16635	0.23317	0.234999	0.0458393	20
TCGA-AX-A0IW	51.9499	4.15677	5.50963	3.44803	0.184363	0.227521	0.0647217	31
TCGA-AX-A0IZ	0.111505	0.0351956	5.74522	0.504314	0.318446	0.0764152	0.0912973	NA
TCGA-AX-A0J0	1.85872	0.982067	1.59962	1.37403	0.224385	0.0646128	0.165421	4471
TCGA-AX-A0J1	64.9604	4.39315	5.30005	2.83998	0.400155	0.352082	0.295002	2620
TCGA-AX-A1C4	10.6966	8.66238	4.39184	0.391098	0	0.0280707	0.0191643	288
TCGA-AX-A1C5	39.7155	2.75946	5.54779	0.346842	0.0438023	0.157664	0.010764	421
TCGA-AX-A1C7	6.52677	1.89883	3.61394	4.03083	0	0.0185705	0.576867	17
TCGA-AX-A1C8	13.7776	10.5761	9.9208	4.1221	0	0.0681375	0.0116296	48
TCGA-AX-A1C9	51.5995	2.68292	11.3964	3.56794	0.523573	0.61677	0.619921	486
TCGA-AX-A1CA	11.2202	3.44318	10.659	3.37569	0.355259	0.27542	0.120879	75
TCGA-AX-A1CC	2.14214	5.6711	8.64179	8.62163	2.1862	0.786911	1.01127	7
TCGA-AX-A1CE	270.916	1.17838	2.38678	1.5113	0.394884	0.106602	0.242597	5678
TCGA-AX-A1CF	32.0899	0.389395	14.5685	0.852438	0.1468	0.422719	0.156323	60
TCGA-AX-A1CI	23.5881	0.166599	13.0654	0.309448	0.167485	0.301427	0.17492	9
TCGA-AX-A1CJ	39.8339	13.8184	18.6236	4.00517	0.988463	0.19232	0.14443	13
TCGA-AX-A1CK	56.1738	0.437122	26.6075	0.108741	0.308987	0.593163	0.273349	12
TCGA-AX-A1CN	2.79873	1.00731	2.44709	1.09143	0.126583	0	0.0311066	12
TCGA-AX-A2H2	12.2503	6.73705	5.40038	4.607	0.648945	0.064437	0.285949	41
TCGA-AX-A2H4	33.2398	3.44509	21.5992	4.90837	0.737943	0.594986	0.362684	105
TCGA-AX-A2H5	3.84435	21.062	23.1815	2.16204	0.140536	0.375776	0.118407	25
TCGA-AX-A2H7	49.8893	4.69282	2.18832	1.47247	0.2841	0.260299	0.0888551	NA
TCGA-AX-A2HA	9.2312	1.8648	23.8522	1.25252	0.307571	0.506096	0.30233	809
TCGA-AX-A2HC	0.032656	0.144306	0.51923	0.191458	0.0362685	0.0261093	0.0623883	7771
TCGA-AX-A2HD	84.8167	11.2932	3.13866	1.121	0.0416381	0.0299748	0.0511607	4043
TCGA-AX-A2HG	3.41141	7.9846	7.26094	2.56788	0.481625	0.20803	0.13019	352
TCGA-AX-A2HH	7.38471	0.652657	0.854027	0.477983	0.00984194	0.0283404	0.0338598	20
TCGA-AX-A2HJ	4.26614	4.16023	3.56333	3.84441	0.394839	0.0631645	0.0646851	265
TCGA-AX-A2HK	14.6445	0.143172	3.64811	0.740819	0.107951	0.0777124	0.0176852	27
TCGA-AX-A2IN	0.692681	4.33381	11.3029	4.83713	0.114254	0.0986998	0.123537	190
TCGA-AX-A2IO	45.8265	2.21422	5.8115	1.20866	0.07155	0.240371	0.0937743	194
TCGA-AX-A3FX	18.361	4.23261	9.68762	5.5823	0.676133	0.214166	0.159507	26
TCGA-AX-A3G1	96.9211	8.72817	7.97852	3.24675	1.70674	0.376348	0.498763	22
TCGA-AX-A3G8	15.521	130.055	11.57	1.69309	0.0397595	0.0954081	0	338
TCGA-AX-A3G9	14.0277	0.969529	12.2012	0.232763	0	0.0835317	0.0456227	217
TCGA-AX-A3GB	7.54334	4.02305	15.4869	3.54199	0.223657	0.422646	0.247326	46
TCGA-B5-A0JN	258.547	0.673547	1.62486	0.38675	0.0832538	0.0599335	0.0286423	91
TCGA-B5-A0JR	73.5068	4.1514	8.69761	4.47601	0.316973	0.646526	0.253152	109
TCGA-B5-A0JS	38.7259	9.73904	12.2742	4.16644	0.624417	2.33746	0.0982042	10
TCGA-B5-A0JT	74.2719	2.25964	6.2643	0.607382	0.13276	0.318574	0.0434991	21
TCGA-B5-A0JU	28.3948	0.300051	7.21682	0.651424	0.123401	0	0.0101082	135
TCGA-B5-A0JV	6.63985	20.5253	11.5402	1.00257	0.102659	0.110855	0.0630687	174
TCGA-B5-A0JX	160.455	3.47516	14.4148	4.22832	0.298238	0.521411	0.575843	30
TCGA-B5-A0JY	0.0914795	4.37933	3.79215	1.58218	0.253998	0.365701	0.137318	4625
TCGA-B5-A0JZ	13.3325	9.42656	17.8546	12.3715	0.912453	0.898868	0.401247	220
TCGA-B5-A0K0	6.25768	4.68643	12.2061	3.31841	1.17133	0.168646	0.211085	9
TCGA-B5-A0K1	71.1314	1.37361	8.03561	1.09346	0.143846	0.124264	0.0424183	18
TCGA-B5-A0K2	73.0352	73.4397	25.3217	4.90945	1.11259	1.15007	0.420628	148
TCGA-B5-A0K3	12.1241	4.81545	3.63907	1.21854	0.0480901	0.380815	0.106359	19
TCGA-B5-A0K4	0.483621	36.3678	15.3737	2.25855	0.0555642	0.16	0	29
TCGA-B5-A0K6	24.9123	25.3651	23.0396	5.29209	0.507215	1.28873	0.0439916	141
TCGA-B5-A0K7	37.3249	5.54412	16.452	5.45184	0.737685	0.221271	0.287024	24
TCGA-B5-A0K8	39.4801	12.6792	13.4274	3.27288	0.628664	1.09241	0.277013	26
TCGA-B5-A0K9	55.1885	19.2475	17.2373	2.02366	0.463387	0.272935	0.0517603	309
TCGA-B5-A11E	51.0978	4.09762	6.61961	1.48789	0.135507	0.11706	0.146518	4605
TCGA-B5-A11F	2.33141	2.7333	2.94887	2.65006	0	0	0.0259713	16
TCGA-B5-A11G	3.51923	10.0714	17.529	2.97702	0.418771	0.643134	0.082327	145
TCGA-B5-A11H	122.7	4.09395	8.18312	5.87096	0.749002	0.228751	0.546601	351
TCGA-B5-A11I	14.1694	2.66318	6.36221	5.58272	0.691649	0.192739	0.328966	20
TCGA-B5-A11J	25.0906	5.25253	11.8227	1.25655	0.22572	0.502252	0.31264	145
TCGA-B5-A11L	35.8077	8.36652	19.8351	1.18931	0.425558	0.180209	0.098425	45
TCGA-B5-A11M	11.1092	3.16267	10.3644	4.03268	0.780806	0.698819	0.165946	14
TCGA-B5-A11N	12.2896	4.55913	32.2128	3.46917	2.32539	0.764229	1.18015	1179
TCGA-B5-A11O	77.361	23.2914	17.9614	10.8863	1.02026	0.312542	0.128026	44
TCGA-B5-A11P	51.5581	4.2004	3.09095	0.521715	0	0.0646788	0.0220786	22
TCGA-B5-A11Q	3.1608	4.18188	13.1184	0.898825	0.220717	0.136193	0	15
TCGA-B5-A11R	26.5081	5.29774	5.09135	2.18262	0.233593	0.269058	0.149248	201
TCGA-B5-A11S	84.0467	1.18435	5.19132	2.44162	0.366355	0.296702	0.0562675	27
TCGA-B5-A11U	1.70437	2.57658	4.64997	3.76033	0.249066	0.0717201	0.0244822	111
TCGA-B5-A11V	1.71446	1.54329	9.27204	2.40122	0.185122	0.152305	0.0129977	26
TCGA-B5-A11W	5.58291	12.4784	5.89162	1.76467	0.431339	0.543403	0.0927475	38
TCGA-B5-A11X	0.0771304	1.70419	5.13575	2.25198	0.282687	0.259004	0.543109	30
TCGA-B5-A11Y	90.8836	10.8136	21.6483	2.12633	0.552221	0.841845	0.526846	408
TCGA-B5-A11Z	62.9598	1.96664	7.73733	0.856155	0.208522	0.0333584	0.170808	27
TCGA-B5-A121	74.1803	2.18573	8.988	1.18316	0.30763	0.0632741	0.107996	11
TCGA-B5-A1MR	0.410184	7.92026	17.1786	12.5157	2.64423	0.641646	0.905328	3073
TCGA-B5-A1MS	81.5103	9.44399	5.3972	1.22013	0.124456	0.281583	0.069906	27
TCGA-B5-A1MU	26.6331	5.15789	8.44338	8.6202	0.214862	0.216547	0.0739202	14
TCGA-B5-A1MV	90.6761	37.8224	9.3488	0.524903	0.37785	0.171796	0.0684177	25
TCGA-B5-A1MW	8.54457	4.97163	1.38343	1.28103	0.0789171	0.0852174	0.0290896	201
TCGA-B5-A1MX	114.421	2.66812	8.82816	1.38793	0.33861	0.2581	0.215367	2781
TCGA-B5-A1MY	35.4261	1.80339	3.49183	2.01486	0.190841	0.103038	0.0703457	25
TCGA-B5-A1MZ	38.3542	5.11495	13.0707	7.51304	0.398103	0.537356	0.134516	25
TCGA-B5-A1N2	67.7941	1.62316	3.33283	2.85241	0.392555	0.0997399	0.465309	40
TCGA-B5-A3F9	23.2297	2.23604	9.25677	2.36877	0.402035	0.373446	0.184844	27
TCGA-B5-A3FA	44.515	2.67426	8.59167	1.01442	0.121794	0.350713	0.0731613	6238
TCGA-B5-A3FB	67.3616	4.00632	9.90075	1.17421	0.109845	0.336072	0.0809795	26
TCGA-B5-A3FC	20.476	7.13294	10.2027	8.62006	0.524334	0.409816	0.44177	6529
TCGA-B5-A3FD	3.88622	13.6517	5.02998	3.25125	0.230355	0.104735	0.035752	17
TCGA-B5-A3FH	102.145	3.91379	5.95573	2.63159	0.372451	0.226873	0.0985664	20
TCGA-B5-A3S1	40.5056	1.34784	5.08228	1.10871	0.28794	0.048773	0.0749207	24
TCGA-B5-A5OC	2.57498	3.94117	11.1144	3.07632	1.08689	0.149829	0.767178	491
TCGA-B5-A5OD	32.3402	4.92839	8.75601	8.95722	0.154429	0.166758	0.0806426	30
TCGA-B5-A5OE	194.3	53.7919	17.6321	3.66665	0.0385025	0.177392	0.0302771	39
TCGA-BG-A0LW	6.30221	1.19275	7.65042	0.552028	0.146401	0.210785	0.10279	20
TCGA-BG-A0LX	20.2233	2.47313	7.71307	4.31351	1.55044	2.23229	0.473681	211
TCGA-BG-A0M0	17.8022	94.5625	0.943775	1.6805	0.0936299	0	0.0115043	49
TCGA-BG-A0M2	23.3821	4.46556	4.45478	3.06349	0.985461	0.354711	0.161445	11
TCGA-BG-A0M3	57.7942	10.3296	8.55026	3.52408	0.258751	0.0372544	0.0381513	30
TCGA-BG-A0M4	85.8592	0.651068	7.89736	1.97595	0.0306812	0.0441741	0.0150792	213
TCGA-BG-A0M6	252.774	1.05728	0.893876	0.65967	0.0430908	0	0.0211783	17
TCGA-BG-A0M7	57.2718	18.0134	17.929	4.3046	0.441477	0.673019	0.127633	35
TCGA-BG-A0M9	53.0252	9.01221	7.66818	1.70813	0.071906	0.0517643	0.0353403	26
TCGA-BG-A0MA	3.94524	0.821801	8.74796	5.56065	0.331945	0.159309	0.0761339	16
TCGA-BG-A0MC	27.0051	44.5144	21.0403	11.3107	1.4241	1.53779	0.0954431	28
TCGA-BG-A0MG	73.3782	41.0556	13.7925	1.96093	0.0928665	0.222845	0.045642	48
TCGA-BG-A0MH	58.4376	6.11856	14.6262	3.99645	0.49682	0.306562	0.267432	NA
TCGA-BG-A0MI	23.8298	4.14443	14.0677	1.25461	0.0880242	0.887148	0.0865242	21
TCGA-BG-A0MK	6.40067	10.1063	12.1581	3.26505	0.346365	0.391826	0.0790359	53
TCGA-BG-A0MO	33.8799	2.14273	13.8639	2.80618	1.04232	0.0750355	0.0512279	23
TCGA-BG-A0MQ	37.2763	13.0274	14.8464	4.88576	0.089567	0.257913	0.0733672	143
TCGA-BG-A0MT	162.827	5.53579	3.67858	2.59079	0.458674	0.132078	0.0112714	14
TCGA-BG-A0MU	22.6286	19.5326	10.0765	2.87771	0.74736	0.0632961	0.118836	28
TCGA-BG-A0RY	232.095	17.5495	5.10843	2.15699	0.0712683	0.136814	0.0116756	18
TCGA-BG-A0VT	21.3868	1.68764	7.75906	2.96055	0.848307	0.271417	0.127394	16
TCGA-BG-A0VV	86.5647	9.23884	10.003	3.07744	0.568149	0.177828	0.230671	11
TCGA-BG-A0VW	65.4278	10.5888	16.4287	3.2268	0.623738	0.224511	0.153277	178
TCGA-BG-A0VX	17.4928	6.62752	10.104	3.82128	0.677175	0.437061	0.413153	92
TCGA-BG-A0VZ	56.2739	2.16498	9.00297	2.25372	0.452042	0.433894	0.308569	136
TCGA-BG-A0W1	5.8642	24.6885	22.0315	0.926582	0.138573	0.266018	0.147562	21
TCGA-BG-A0W2	21.4481	1.31471	6.24003	2.40237	0.450582	0.129748	0.0775081	11
TCGA-BG-A0YU	12.3886	2.16369	7.25561	1.12093	0.414325	0.335551	0.114543	9
TCGA-BG-A0YV	46.7406	0.664717	5.26491	0.986138	0.0455627	0.0984003	0.0447863	43
TCGA-BG-A186	13.2399	1.15982	9.97872	3.02629	0.971661	0.279795	0.131327	17
TCGA-BG-A187	31.3049	2.70668	8.62513	1.77065	0.222266	0.232738	0.00993085	46
TCGA-BG-A18A	28.2628	15.2322	12.5833	1.55963	0.145642	0.419384	0.0818057	33
TCGA-BG-A18B	64.134	5.87657	6.53022	2.7423	0.50202	0.879927	0.08582	140
TCGA-BG-A18C	40.9207	25.7805	15.2338	1.81081	0.388765	0.888992	0.0561971	16
TCGA-BG-A222	355.058	3.80904	15.6612	0.929575	0.356377	0.150913	0.0618184	2398
TCGA-BG-A2AD	1.67985	0.585163	10.773	1.47731	0.819385	0.145198	0.179671	NA
TCGA-BG-A2AE	4.24409	6.78007	12.3403	3.04684	0.515333	0.296786	0.273538	33
TCGA-BG-A2L7	57.4389	4.08866	8.07957	3.25478	0.396798	0.439462	0.555051	249
TCGA-BG-A3EW	32.6464	2.15904	2.68368	1.41592	0.0843467	0.133585	0.0165819	187
TCGA-BG-A3PP	0.347723	0.195565	8.2378	0.311359	0.221181	0.0151644	0.0310588	23
TCGA-BK-A0C9	6.97643	30.937	7.61043	5.17261	1.11596	0.078377	0.160528	144
TCGA-BK-A0CA	54.9019	0.701678	5.73331	0.355453	0.128257	0.0923305	2.68689	20
TCGA-BK-A0CB	16.412	8.25371	10.6232	14.3902	0.163232	0.0293772	0.070197	21
TCGA-BK-A0CC	26.8067	1.46119	2.90449	0.649216	0.0256215	0.0368892	0.0377773	25
TCGA-BK-A139	150.257	0.873782	2.28959	0.256264	0.554798	0.59909	1.12477	60
TCGA-BK-A13B	72.6552	1.36532	7.96036	2.536	0.228763	0.115279	0.185514	295
TCGA-BK-A13C	1.68861	5.98917	8.91116	0.625269	0.0740291	0.284228	0	26
TCGA-BK-A26L	45.0732	1.13128	2.82172	0.4648	0.385212	0.0792315	0.432741	31
TCGA-BK-A4ZD	0.177467	0.232362	7.23985	0.49711	0.492746	0.157654	0.150686	33
TCGA-BK-A56F	32.9978	2.0447	6.75649	0.476678	0.440481	0.174404	0.17319	29
TCGA-BK-A6W3	91.2219	6.86883	15.1102	1.01131	0.275998	0.701252	0.271295	1763
TCGA-BK-A6W4	14.3752	3.31957	8.78906	0.918066	0.305521	0.23686	0.103955	10
TCGA-BS-A0T9	6.73093	10.8268	6.13299	1.84685	0.0672796	0.161446	0.0551109	25
TCGA-BS-A0TA	34.6604	15.3098	35.0583	5.01985	0.367626	1.41147	0.927495	249
TCGA-BS-A0TC	56.8262	5.20542	12.752	2.42985	0.0821955	0.207101	0.0302981	642
TCGA-BS-A0TD	79.6775	162.504	27.6315	7.88841	0.0402784	0.376947	0.237552	12
TCGA-BS-A0TE	0.241676	5.40655	8.67535	2.07224	0.251635	0.217379	0.123673	163
TCGA-BS-A0TG	7.51693	12.6136	11.7504	2.50291	0.529914	0.0803114	0.150782	21
TCGA-BS-A0TI	55.6927	4.41774	8.41409	2.85735	0.62455	0.39965	0.17053	35
TCGA-BS-A0TJ	17.7653	2.44449	2.87202	2.70641	0.190668	0.122009	0.135358	318
TCGA-BS-A0U5	139.489	39.0373	6.88244	1.35971	0.234158	0.37085	0.103576	23
TCGA-BS-A0U7	3.21614	6.43218	5.04034	2.82837	0.48498	0.266005	0.124854	90
TCGA-BS-A0U8	7.87131	3.10438	11.4704	4.80206	0.132993	0.153184	0.169944	187
TCGA-BS-A0U9	120.44	18.1104	5.6631	0.382746	0	0.0695938	0.950256	15
TCGA-BS-A0UA	16.2652	8.65037	9.07877	6.18631	1.88245	0.496254	0.430016	122
TCGA-BS-A0UF	21.6069	4.52708	11.23	5.67868	0.848171	0.387203	0.589703	2950
TCGA-BS-A0UJ	0.947993	5.26476	25.5652	6.24144	0.725621	0.24582	0.0629343	433
TCGA-BS-A0UL	2.62997	9.40526	16.0672	5.19801	2.28102	0.227615	0.82138	162
TCGA-BS-A0UM	73.0309	12.5289	22.5039	5.52029	2.15297	0.822394	0.712624	151
TCGA-BS-A0UT	4.77339	4.2873	12.3535	0.887353	0.0646516	0	0.0635499	2
TCGA-BS-A0UV	42.9461	9.41926	6.51564	2.04231	0.386881	0.238724	0.176562	4486
TCGA-BS-A0V4	13.8606	35.9594	27.6022	5.45246	0.0248288	0.285983	0	111
TCGA-BS-A0V6	54.9856	7.22165	14.8023	0.922644	0.201669	1.03238	0.231271	23
TCGA-BS-A0V7	3.03783	28.6119	37.0733	24.4145	2.43806	0.372301	0.0181554	37
TCGA-BS-A0V8	52.9298	4.13153	27.8802	2.75194	0.22251	0.137299	0.312454	33
TCGA-BS-A0VI	22.2405	2.63189	12.7629	6.9194	0.0261108	0	0.0256659	144
TCGA-BS-A0WQ	6.65911	1.17942	6.37851	1.71344	0.13339	0.128035	0.131117	24
TCGA-D1-A0ZN	34.2209	5.72532	8.94885	1.44687	0.662372	0.0986554	0.157158	20
TCGA-D1-A0ZO	16.6832	3.37396	16.6643	3.41378	0.974779	0.205385	0.268754	256
TCGA-D1-A0ZP	42.3904	1.26351	4.1929	0.834613	0.222966	0.145919	0.079697	16
TCGA-D1-A0ZS	1.91667	3.27603	2.75766	2.7987	0.0200821	0.0578275	0.0296098	134
TCGA-D1-A0ZU	17.2692	4.93231	3.57097	1.52201	0.125357	0.210567	0.112952	16
TCGA-D1-A0ZV	148.52	62.6431	29.5574	2.74222	0.785749	0.785628	0.214544	16
TCGA-D1-A0ZZ	120.425	5.66831	13.2092	3.6275	0.0209503	0.120655	0.0617797	22
TCGA-D1-A101	8.01345	22.9746	17.1388	3.55198	1.61057	0.309183	0.316626	218
TCGA-D1-A102	6.16925	3.99209	6.48	2.57159	0.376249	0.0855341	0.155721	20
TCGA-D1-A103	91.3455	2.6431	14.6903	1.15722	0.259073	0.487779	0.303631	2468
TCGA-D1-A15V	76.333	15.5971	5.33715	1.5727	0.137201	0.112879	0.0674315	29
TCGA-D1-A15W	78.4286	25.5267	18.524	0.942467	0.17418	0.188085	0.181913	41
TCGA-D1-A15X	7.21731	5.25927	38.5243	2.19407	0.466522	0.641157	0.333507	708
TCGA-D1-A15Z	10.2557	0.675097	3.93135	1.07482	0.154918	0	0.054385	15
TCGA-D1-A160	10.3216	5.87519	11.1965	4.89834	0.917422	0.603833	0.33495	187
TCGA-D1-A161	39.9817	3.66667	13.7316	2.28112	0.604038	0.836232	0.1256	37
TCGA-D1-A162	78.4353	1.37974	6.87061	1.09834	0.169353	0.174165	0.380496	NA
TCGA-D1-A163	22.757	3.48123	10.8787	4.17919	0.254014	0.243816	0.135246	181
TCGA-D1-A167	4.48864	6.67532	5.27288	0.733821	0	0.0345075	0.306265	859
TCGA-D1-A168	12.5645	2.41634	3.00455	1.2396	0.0607299	0	0.0198983	20
TCGA-D1-A169	8.88473	23.6114	16.0367	4.01527	0.452264	0.147991	0.0808286	25
TCGA-D1-A16B	30.5212	3.63226	5.90506	1.72591	0.297222	0.1834	0.0730393	18
TCGA-D1-A16D	122.791	143.78	19.7204	1.17632	0.178267	0.224582	0.0109518	16
TCGA-D1-A16E	112.521	37.312	16.6713	1.65711	0.27815	0.0858159	0.234351	22
TCGA-D1-A16F	85.3153	6.41373	14.4928	0.788855	0.249059	0.418354	0.051003	211
TCGA-D1-A16G	22.5404	3.55531	13.8722	3.26039	0.27879	0.524901	0.0526998	11
TCGA-D1-A16I	3.47145	3.05279	3.06831	2.39979	0.0575443	0.124276	0.0565637	18
TCGA-D1-A16J	10.9816	10.5749	14.677	5.86572	1.39476	0.267753	0.319899	61
TCGA-D1-A16N	42.7628	3.77936	3.58781	1.42852	0.184506	0.147582	0.191438	58
TCGA-D1-A16O	11.8152	0.488523	5.23965	1.09375	0.0920854	0.0994369	0.0452581	14
TCGA-D1-A16Q	29.6457	5.29273	15.6252	9.31214	0.635456	0.182983	0.0874479	18
TCGA-D1-A16S	38.8772	1.49118	5.78305	2.81579	0.130736	0.0752926	0	26
TCGA-D1-A16V	11.4872	2.43379	11.5335	2.32951	0.78645	0.0629063	0.26842	19
TCGA-D1-A16X	24.0904	4.6461	18.8695	5.73395	0.728835	0.169252	0.392873	1426
TCGA-D1-A16Y	0.441376	1.47676	6.50637	1.10903	0	0	0.0103253	304
TCGA-D1-A174	13.2023	7.54577	18.0188	12.6897	1.92111	1.34752	0.375253	253
TCGA-D1-A175	2.123	1.44987	2.96849	1.06364	0.34296	0.0925849	0.105349	NA
TCGA-D1-A176	135.507	26.2798	15.425	2.13661	0.289103	0.25615	0.109299	157
TCGA-D1-A177	2.52636	0.68152	9.30114	2.14426	0.048939	0.0352306	0.0360787	314
TCGA-D1-A179	4.0146	1.88492	5.47132	1.21363	0.0627004	0	0.010272	NA
TCGA-D1-A17A	68.0914	36.4721	12.2713	2.01889	0.159352	0.55719	0.0559416	125
TCGA-D1-A17B	40.782	9.60565	16.1613	9.97981	0.568902	0.913604	0.193572	133
TCGA-D1-A17C	14.9796	3.09214	8.98773	4.03412	0.712385	0.124324	0.137927	7
TCGA-D1-A17D	24.7568	5.32366	8.18191	3.54397	0.305157	0.168984	0.0461472	178
TCGA-D1-A17F	17.999	11.7797	27.6115	3.80711	0.435619	1.35892	0.166521	94
TCGA-D1-A17H	40.1757	59.197	17.1794	4.22565	0.398143	0.301704	0.144185	283
TCGA-D1-A17K	56.8901	47.381	8.17201	1.77139	0.265992	0.117837	0.0905052	30
TCGA-D1-A17L	10.7262	3.6731	20.8903	4.67835	1.46903	0.208041	0.295901	32
TCGA-D1-A17M	15.9871	43.076	11.4347	2.49312	0.193557	0.0557358	0.0951293	196
TCGA-D1-A17N	8.2537	11.0524	14.2704	10.509	1.11112	0.499927	0.0910155	7
TCGA-D1-A17Q	29.7814	20.2445	9.68397	1.75408	0.124606	0.0299007	0.0816548	2945
TCGA-D1-A17R	45.2062	22.8729	9.26648	2.0255	0.163275	0.0293849	0.0100308	97
TCGA-D1-A17S	36.4641	1.86552	19.9915	2.56789	0.0293038	0	0.216033	26
TCGA-D1-A17T	16.8628	4.18931	17.2335	5.74738	0.268826	0.322541	0.187173	20
TCGA-D1-A17U	69.9486	3.22934	9.11184	2.27079	0.101454	0.0292142	0.0698074	167
TCGA-D1-A1NS	60.4969	61.8338	22.7668	1.83338	0.219812	0	0.12964	125
TCGA-D1-A1NU	115.14	3.84623	5.58069	2.44022	0.239851	0.0627877	0.160748	44
TCGA-D1-A1NX	9.67875	3.7688	6.0381	1.93191	0.409024	0.247959	0.0529018	27
TCGA-D1-A1NY	195.022	28.5158	9.76523	1.73476	0.0400758	0.288501	0.0590893	203
TCGA-D1-A1NZ	92.9271	19.0796	15.7775	3.30379	0.565001	0.531889	0.352448	350
TCGA-D1-A1O0	29.2773	1.58903	3.99058	0.689968	0.261406	0.313639	0.0214126	31
TCGA-D1-A1O5	25.5835	1.26081	7.08919	1.5772	0.203709	0.130354	0.222486	25
TCGA-D1-A1O7	69.014	15.9564	23.2973	1.6952	0.0226146	0.45584	0.088917	164
TCGA-D1-A1O8	0.31345	2.88568	12.0358	5.05372	0.348124	0.501222	0.541804	30
TCGA-D1-A2G0	1.88882	2.2697	3.68951	1.36967	0.193215	0.079482	0.29845	250
TCGA-D1-A2G5	26.1799	6.1471	4.638	1.22335	0.16222	0.166829	0	117
TCGA-D1-A2G6	122.384	6.33704	4.61262	3.67835	0.179177	0.0859919	0.058708	20
TCGA-D1-A2G7	174.985	0.334975	5.57871	0.933297	0.0505135	0.109092	0.0868923	23
TCGA-D1-A3DA	70.1157	5.98739	3.75146	1.90411	0.0453712	0.0653244	0.00557475	29
TCGA-D1-A3DG	0.458315	5.48223	4.49232	1.40375	0.0131642	0.0568605	0.0388195	50
TCGA-D1-A3DH	35.2181	18.4784	2.13432	0.186017	0	0.05854	0.00666103	41
TCGA-D1-A3JQ	69.8001	1.48092	4.7545	2.90857	0.411862	0.69841	0.139446	19
TCGA-DF-A2KN	36.3842	16.4338	19.7087	5.46713	0.52014	0.998514	0.40334	1808
TCGA-DF-A2KR	135.505	1.15287	12.8167	0.678874	0.154798	0.0685768	0.0936369	37
TCGA-DF-A2KS	2.77598	23.6701	13.1945	1.94844	0.195405	1.15662	3.15857	54
TCGA-DF-A2KU	11.2215	11.0761	13.4681	10.6589	0.700521	0.949265	0.371295	5574
TCGA-DF-A2KV	62.8633	5.35006	38.0236	1.96565	0.0846271	1.05598	0.0485246	683
TCGA-DF-A2KY	0.00710395	251.42	17.3025	4.43568	0.248529	0.494141	0.110514	NA
TCGA-DF-A2KZ	4.69546	2.72153	7.95171	1.77553	0.293144	0.133283	0.0985772	268
TCGA-DF-A2L0	28.0288	4.4058	3.56785	2.23936	0.109171	0.696094	0	17
TCGA-DI-A0WH	2.7619	136.898	10.4035	3.44592	0.203991	0.358969	0.367611	286
TCGA-DI-A1BU	1.56845	7.76475	5.76295	4.35582	0.255399	0.367719	0.115868	3587
TCGA-DI-A1BY	17.1905	8.37534	16.7713	10.8675	1.01039	0.454605	0.325884	26
TCGA-DI-A1NN	33.1936	2.54241	8.49335	3.9049	0.744228	0.487056	0.598537	16
TCGA-DI-A1NO	15.845	0.801272	1.46643	1.96262	0.0232366	0	0.182725	95
TCGA-DI-A2QT	308.341	2.57966	4.58243	1.72654	0.0247775	0.107022	0.0243553	6
TCGA-DI-A2QU	12.5145	13.5657	2.40218	1.13674	0.14682	0.0704625	0.120265	30
TCGA-DI-A2QY	137.625	2.25663	5.83017	3.02479	0.112598	0.0540385	0	45
TCGA-E6-A1LX	88.9277	0.578463	6.09971	0.951669	0.174462	0.209322	0.0714538	5331
TCGA-E6-A1LZ	66.1775	4.2114	6.5715	1.93022	0.0962229	0.13854	0.106406	151
TCGA-E6-A1M0	0.128005	1.10559	1.86913	0.880105	0.193862	0.0558236	0.152447	982
TCGA-E6-A2P8	1.02868	4.67097	6.83227	3.31942	0.526256	0.29142	0.318331	201
TCGA-E6-A2P9	8.2449	3.01311	4.5854	2.69229	0.765012	0.250329	0.387381	423
TCGA-E6-A8L9	1.16839	8.57547	6.22296	4.29904	0.469834	2.60919	0.0439836	17
TCGA-EC-A1NJ	40.9632	3.97413	11.2894	2.06655	1.59489	0.278338	0.962004	56
TCGA-EC-A1QX	10.0932	10.283	23.0974	1.53169	0.285396	0.582119	0.140267	287
TCGA-EC-A24G	44.7979	2.37641	20.8429	2.24369	0.729218	0.35997	0.255997	365
TCGA-EO-A1Y5	14.7066	4.3604	6.90817	3.13825	0.382814	0.745698	0.320954	26
TCGA-EO-A1Y7	14.5446	8.28984	12.4501	1.52287	0.111815	0.611757	0.010991	18
TCGA-EO-A1Y8	110.774	4.2867	9.1355	1.39025	0.119708	0.448119	0.0117668	14
TCGA-EO-A22R	16.4846	0.78529	14.2267	0.893042	0.197367	0.32476	0.124717	6515
TCGA-EO-A22S	6.74398	7.24437	3.51699	0.491961	0.0517742	0.0372717	0.050892	245
TCGA-EO-A22T	29.5653	9.78286	15.3068	2.32944	0.432621	0.311439	0.637873	413
TCGA-EO-A22U	0.881552	8.62132	3.28494	0.940484	0.156491	0.190649	0.283983	5937
TCGA-EO-A22X	0.485384	2.64863	3.23953	2.72933	0.110266	0.0881992	0.102365	4818
TCGA-EO-A22Y	59.7473	12.1363	2.48073	1.14957	0.0439934	0.0950111	0.0648655	24
TCGA-EO-A2CG	15.7759	1.06004	4.0179	4.64113	0.117538	0.169229	0.115535	12
TCGA-EO-A2CH	169.143	0.939873	16.8596	0.983329	0.182226	0.145758	0.0597068	25
TCGA-EO-A3AS	215.796	10.2835	7.6108	0.645447	0.447326	0.300557	0.0439703	70
TCGA-EO-A3AU	11.0475	6.63822	10.5324	1.51527	0.615091	0.382021	0.31416	235
TCGA-EO-A3AV	0.620749	25.6261	40.6139	1.24984	0.299352	2.29214	0.120375	2383
TCGA-EO-A3AY	90.2575	35.1884	44.3947	6.10325	0.024971	0.19774	0.0613637	1683
TCGA-EO-A3AZ	0.0655737	15.7924	21.161	5.08916	0.191173	1.86774	0.174492	297
TCGA-EO-A3B0	24.8461	2.73467	6.31613	2.60961	0.16649	0.258148	0.23289	5352
TCGA-EO-A3B1	24.723	20.5339	12.1325	6.22635	0.433831	0.761256	0.233208	22
TCGA-EO-A3KU	21.4657	2.21345	4.95941	1.46081	0.0855855	0.0410747	0.0911376	22
TCGA-EO-A3KW	48.3217	8.25192	7.6897	2.68156	0.315355	0.220885	0.188502	27
TCGA-EO-A3KX	45.5173	20.3416	5.05956	1.74192	0.211186	0.0950189	0.129742	955
TCGA-EO-A3L0	51.0126	139.464	9.41026	1.2183	0.271513	0.390919	0.0611615	27
TCGA-EY-A1GC	30.1398	34.6565	10.7062	3.91486	0.283554	0.21983	0.343043	12
TCGA-EY-A1GD	1.01679	120.847	5.57456	1.88774	0.211738	0.0677456	0.0578137	600
TCGA-EY-A1GE	26.7009	2.04825	12.7166	1.05638	2.1099	0.563713	0.149666	20
TCGA-EY-A1GF	5.23338	0.651006	3.32579	0.715654	0.42073	0.10096	0.333146	113
TCGA-EY-A1GH	86.0843	0.933171	10.5143	0.546213	0.289718	0.11918	0.0813661	20
TCGA-EY-A1GI	50.6781	1.04412	4.55264	0.57322	0.271467	0.195426	0.266841	1923
TCGA-EY-A1GK	18.4181	2.82687	4.37286	1.90412	0.351335	0.741905	0.50651	373
TCGA-EY-A1GL	1.55179	10.8112	5.04611	1.59117	0.154011	0.0316773	0.135166	30
TCGA-EY-A1GM	15.5587	0.340645	7.3103	0.949095	0.128421	0	0.0631165	18
TCGA-EY-A1GO	15.0179	3.12117	1.71033	0.559036	0.0294167	0.0635302	0.361442	111
TCGA-EY-A1GP	2.2123	3.48552	5.16682	2.53145	0.408342	0.407023	0.200692	8
TCGA-EY-A1GQ	5.81733	1.80899	3.64249	0.757917	0.287149	0.0689052	0.0117607	119
TCGA-EY-A1GR	10.7608	4.99732	4.01195	1.27136	0.194223	0	0.0763654	20
TCGA-EY-A1GS	8.54891	0.548903	17.8818	2.82735	0.170416	0.0350516	0.0239303	168
TCGA-EY-A1GT	30.674	38.9653	8.32992	2.7093	0.10103	0.116368	0.0297925	35
TCGA-EY-A1GU	136.011	5.27556	12.8802	0.848624	0.350369	0.326411	0.131682	636
TCGA-EY-A1GV	64.4495	4.09755	14.424	0.941565	0.222955	0.504437	0.0313079	11
TCGA-EY-A1GW	54.4331	5.82731	5.80524	0.695824	0.0732289	0.140578	0.0359905	28
TCGA-EY-A1GX	79.8772	0.497733	8.63773	1.12262	0.0208492	0	0.00512348	30
TCGA-EY-A1H0	22.7553	3.24812	5.27934	1.6948	0.0617408	0.29631	0.0303443	105
TCGA-EY-A210	7.11384	4.29062	8.91316	6.14797	0.409777	0.450254	0.222597	15
TCGA-EY-A212	218.242	2.06742	5.65769	1.25171	0.131731	0.189663	0.043162	33
TCGA-EY-A214	28.3686	31.1749	9.00123	4.05216	0.601643	0.597402	0.203928	30
TCGA-EY-A215	1.81455	19.3779	13.5866	4.57455	0.529011	2.10363	0.297141	2453
TCGA-EY-A2OM	76.4957	1.02717	7.17919	1.53624	0.093876	0.0337902	0.0807417	107
TCGA-EY-A2ON	291.134	1.83561	14.7595	2.58526	0.039924	0.0766422	0.0523248	47
TCGA-EY-A2OO	96.6006	10.691	4.88222	1.40156	0.0136857	0.354679	0.0134525	22
TCGA-EY-A2OP	4.08315	2.14883	6.78123	0.84171	0.0128587	0	0.0315989	226
TCGA-EY-A2OQ	11.8971	13.4347	5.88789	0.97794	0.0475011	0.871986	0.0116729	15
TCGA-EY-A3L3	2.3377	0.440306	1.2423	1.26721	0.0638435	0.0183841	0.0376533	33
TCGA-EY-A3QX	9.84593	1.5495	13.8136	1.92853	0.435797	0.267001	0.0546856	17
TCGA-EY-A4KR	53.3406	5.98565	9.58693	3.58945	0.598558	1.65464	0.223576	39
TCGA-EY-A547	1.53407	168.776	10.0768	1.85657	0	0.911455	0.0230468	66
TCGA-EY-A548	9.40172	5.01504	20.5692	1.85175	0.433764	0.475181	0.0695172	180
TCGA-EY-A549	90.4065	23.5949	15.921	1.51768	0.336436	0.220179	0.300639	535
TCGA-EY-A54A	19.1129	1.91822	12.5618	0.983291	1.63258	1.2936	0.285411	47
TCGA-EY-A5W2	6.69463	5.56963	10.6973	4.53396	0.189925	0.0911499	0.0311147	287
TCGA-EY-A72D	237.42	2.09448	1.90826	1.89374	0.0487413	0.0140353	0.0239554	30
TCGA-FI-A2CX	0.0484184	9.33401	30.4013	17.2452	4.09359	0.551642	1.87316	9
TCGA-FI-A2CY	7.512	9.78078	14.9247	8.29718	0.409701	0.938443	0.585773	19
TCGA-FI-A2D0	5.6789	15.669	6.05408	2.38747	0.0692244	0.89701	0.0113408	3110
TCGA-FI-A2D2	90.5718	2.37568	7.3621	0.786211	0.100631	0.144887	0.0494582	16
TCGA-FI-A2D4	11.0614	1.07926	1.39584	1.49657	0.0787499	0.0755882	0.0774079	102
TCGA-FI-A2D5	80.9096	0.747237	2.12019	1.40382	0.0676091	0.0648947	0.066457	6740
TCGA-FI-A2D6	0.104744	6.01717	4.308	3.98396	0.588923	0.188426	0.246563	260
TCGA-FI-A2EU	91.2371	24.0366	2.04759	2.0709	0.0612965	0.0882533	0.040168	19
TCGA-FI-A2EW	48.1197	2.14865	18.4092	1.74098	0.0867891	0.166609	0.0284367	42
TCGA-FI-A2EX	137.212	16.3471	4.24798	2.22504	0.0638629	0.0919485	0	32
TCGA-FI-A2EY	31.7945	2.55165	5.52806	3.39007	0.0132684	0	0.0130423	37
TCGA-FI-A2F4	30.5318	8.76916	16.9047	1.90599	0.361057	0.324902	0.476903	883
TCGA-FI-A2F8	259.008	12.4159	9.12671	2.1588	0.197084	0.461105	0.0968626	41
TCGA-FI-A2F9	2.02181	0.148905	1.2547	1.18536	0.0561365	0.0404121	0.013795	19
TCGA-FI-A3PV	437.666	2.16353	18.3795	1.09715	0.132919	0.0695906	0.0772047	35
TCGA-FI-A3PX	1.22978	0.640255	2.40462	0.671278	0.0353229	0.135619	0.104163	45
TCGA-H5-A2HR	14.8421	3.16384	5.66427	2.19875	0.0378651	0.436139	0.186099	23
TCGA-JU-AAVI	14.5112	5.36104	7.50254	3.4075	0.344681	0.383477	0.207905	23
TCGA-K6-A3WQ	126.249	1.49151	3.9393	0.893679	0.0483692	0.139282	0.0178294	10
TCGA-KP-A3VZ	29.5964	0.576707	1.62059	0.85099	0.0530282	0.0305395	0.0312747	30
TCGA-KP-A3W0	137.64	6.87606	12.6408	2.15283	0.206078	0.0780806	0.159921	12
TCGA-KP-A3W1	60.315	10.7563	15.2957	5.02059	1.17255	0.687788	0.42154	15
TCGA-KP-A3W3	128.151	4.7112	3.87292	2.88789	0.309425	0.249482	0.358899	23
TCGA-KP-A3W4	108.402	2.19617	4.33316	0.902632	0.521964	0.233228	0.13269	25
TCGA-PG-A5BC	80.6425	1.05572	2.45015	1.30204	0.448452	0.0645672	0.121223	31
TCGA-PG-A6IB	0.262571	9.92357	13.6177	6.34403	0.253246	2.83408	0.311163	161
TCGA-PG-A7D5	66.374	0.936184	5.52012	0.60007	0.0641703	0.118788	0.0720878	16
TCGA-PG-A914	41.3438	18.5765	12.3791	4.59747	0.26244	0.237909	0.224528	87
TCGA-PG-A915	57.8828	1.86047	3.2186	0.507485	0.0686675	0.155361	0.0482124	51
TCGA-PG-A916	17.6596	9.71546	10.7646	1.31155	0.305634	0.59619	0.0533014	15
TCGA-PG-A917	15.3871	13.999	21.9248	2.08297	0.634152	1.17681	0.470972	316
TCGA-QF-A5YS	84.1299	117.893	24.0206	5.58304	0.211523	0.365455	0.195443	888
TCGA-QF-A5YT	12.3711	4.69142	3.47929	2.10146	0.0227478	0.0982553	0.0167701	7
TCGA-QS-A5YQ	21.6654	6.60759	21.1845	5.54276	0.267852	0.366366	0.302781	378
TCGA-QS-A5YR	43.4944	10.1032	16.2912	7.2493	0.181374	1.28704	0.25469	98
TCGA-QS-A744	61.6422	7.61975	2.05554	0.711091	0.0324589	0.0584169	0.0119646	21
TCGA-QS-A8F1	13.5334	36.3817	5.96265	1.77316	0	0.109913	0.0625325	24
TCGA-SJ-A6ZI	54.6581	37.7529	20.4734	2.56135	0.519254	3.26007	0.518773	741
TCGA-SJ-A6ZJ	33.5977	1.8756	7.76487	3.09279	0.343445	0.232699	0.104257	22
